# Supplementary material for: Molecular simulations of nitrogen-doped hierarchical carbon adsorbents for post-combustion CO2capture
Source: Royal Society of Chemistry journal article supplement (doi:10.1039/c6cp05865e), 2016-01-01
Supplement: c6cp05865e1.pdf [file c6cp05865e1.pdf]

Supporting Document for:

**Molecular simulations of nitrogen-doped hierarchical carbon adsorbents for post-combustion CO<sub>2</sub> capture**

Peter Psarras<sup>a,1</sup>, Jiajun He<sup>a</sup>, Jennifer Wilcox<sup>b,1</sup>

<sup>a</sup>Department of Energy Resources Engineering, Stanford University, Stanford CA

<sup>b</sup>Department of Chemical and Biological Engineering, Colorado School of Mines, Golden CO

<sup>1</sup>corresponding author

**Table S1. Carbon dioxide capacity for SU-MAC-500 and SU-MAC-800 carbonaceous sorbents at 298K.**

| SU-MAC-500     |                        | SU-MAC-800     |                      |
|----------------|------------------------|----------------|----------------------|
| Pressure (bar) | Adsorption<br>(mmol/g) | Pressure (bar) | Adsorption<br>mmol/g |
| 4.80E-05       | 0.005530242            | 5.30E-04       | 0.001165907          |
| 8.12E-05       | 0.010010721            | 7.55E-04       | 0.002175467          |
| 1.08E-04       | 0.01362012             | 1.01E-03       | 0.003372644          |
| 1.28E-04       | 0.016242294            | 2.51E-03       | 0.010823729          |
| 3.06E-04       | 0.030858572            | 5.02E-03       | 0.023528098          |
| 5.40E-04       | 0.046314661            | 7.53E-03       | 0.036531761          |
| 8.20E-04       | 0.061958367            | 1.01E-02       | 0.048177432          |
| 1.06E-03       | 0.074086483            | 2.51E-02       | 0.113441437          |
| 2.65E-03       | 0.136076119            | 5.02E-02       | 0.211940499          |
| 5.13E-03       | 0.215523095            | 7.54E-02       | 0.308675065          |
| 7.53E-03       | 0.281845796            | 1.01E-01       | 0.402925936          |
| 1.01E-02       | 0.340681676            | 1.25E-01       | 0.4934736            |
| 2.70E-02       | 0.642602519            | 1.50E-01       | 0.582596266          |
| 5.03E-02       | 0.938689359            | 1.99E-01       | 0.745725007          |
| 7.60E-02       | 1.197686054            | 2.49E-01       | 0.905918878          |
| 1.02E-01       | 1.422741892            | 2.99E-01       | 1.065152327          |
| 1.25E-01       | 1.590319843            | 3.49E-01       | 1.221227553          |
| 1.49E-01       | 1.752863397            | 4.02E-01       | 1.400754936          |
| 2.00E-01       | 2.039185205            | 4.49E-01       | 1.542486375          |
| 2.51E-01       | 2.284758331            | 4.99E-01       | 1.689801662          |
| 3.01E-01       | 2.50087108             | 5.49E-01       | 1.838269454          |
| 3.52E-01       | 2.703886358            | 5.99E-01       | 1.983721969          |
| 4.02E-01       | 2.904283927            | 6.49E-01       | 2.128312338          |
| 4.49E-01       | 3.063137675            | 7.01E-01       | 2.277217904          |
| 4.99E-01       | 3.218449031            | 7.49E-01       | 2.415062986          |
| 5.49E-01       | 3.369235236            | 8.00E-01       | 2.556821228          |
| 6.00E-01       | 3.511668007            | 8.51E-01       | 2.700044671          |

|          |             |          |             |
|----------|-------------|----------|-------------|
| 6.50E-01 | 3.647820066 | 9.01E-01 | 2.841441079 |
| 7.00E-01 | 3.776293219 | 9.49E-01 | 2.974157956 |
| 7.51E-01 | 3.904051639 | 9.99E-01 | 3.109318324 |
| 8.00E-01 | 4.027454659 |          |             |
| 8.50E-01 | 4.1452917   |          |             |
| 9.00E-01 | 4.255780398 |          |             |
| 9.50E-01 | 4.384834271 |          |             |
| 1.00E+00 | 4.497449299 |          |             |

**Table S2. Pore size distributions for SU-MAC-500 and SU-MAC-800.**

| N <sub>2</sub><br>Pore size<br>(nm) | SU-MAC-500                         |                                      | SU-MAC-800                         |                                     |                                     |                                      |                                     |
|-------------------------------------|------------------------------------|--------------------------------------|------------------------------------|-------------------------------------|-------------------------------------|--------------------------------------|-------------------------------------|
|                                     | N <sub>2</sub><br>dV/dD<br>cc/nm/g | CO <sub>2</sub><br>Pore size<br>(nm) | N <sub>2</sub><br>dV/dD<br>cc/nm/g | N <sub>2</sub><br>Pore size<br>(nm) | CO <sub>2</sub><br>dV/dD<br>cc/nm/g | CO <sub>2</sub><br>Pore size<br>(nm) | CO <sub>2</sub><br>dV/dD<br>cc/nm/g |
| 0.545                               | 1.50E+00                           | 0.3053                               | 0                                  | 0.545                               | 6.28E-01                            | 0.3053                               | 0.00E+00                            |
| 0.571                               | 1.96E+00                           | 0.31934                              | 0                                  | 0.571                               | 9.12E-01                            | 0.3193                               | 1.54E-02                            |
| 0.598                               | 1.72E+00                           | 0.33404                              | 0                                  | 0.598                               | 9.31E-01                            | 0.334                                | 1.17E-01                            |
| 0.624                               | 1.20E+00                           | 0.34942                              | 2.824                              | 0.624                               | 8.38E-01                            | 0.3494                               | 2.13E-02                            |
| 0.651                               | 5.84E-01                           | 0.3655                               | 2.40395                            | 0.651                               | 6.46E-01                            | 0.3655                               | 1.44E-01                            |
| 0.677                               | 1.61E-01                           | 0.38232                              | 0                                  | 0.677                               | 5.26E-01                            | 0.3823                               | 1.51E-01                            |
| 0.704                               | 0.00E+00                           | 0.39992                              | 0                                  | 0.704                               | 3.96E-01                            | 0.3999                               | 0.00E+00                            |
| 0.744                               | 0.00E+00                           | 0.41832                              | 0                                  | 0.744                               | 2.09E-01                            | 0.4183                               | 0.00E+00                            |
| 0.783                               | 0.00E+00                           | 0.43758                              | 0                                  | 0.783                               | 2.38E-01                            | 0.4376                               | 0.00E+00                            |
| 0.823                               | 1.37E-02                           | 0.45772                              | 0                                  | 0.823                               | 3.73E-01                            | 0.4577                               | 5.38E-01                            |
| 0.863                               | 8.60E-02                           | 0.4788                               | 1.24865                            | 0.863                               | 5.48E-01                            | 0.4788                               | 2.18E-01                            |
| 0.902                               | 1.09E-01                           | 0.50082                              | 1.47825                            | 0.902                               | 6.86E-01                            | 0.5008                               | 1.20E+00                            |
| 0.942                               | 9.00E-02                           | 0.52388                              | 1.19005                            | 0.942                               | 7.09E-01                            | 0.5239                               | 1.57E-01                            |
| 0.982                               | 5.51E-02                           | 0.548                                | 0.919                              | 0.982                               | 6.43E-01                            | 0.548                                | 1.12E+00                            |
| 1.022                               | 1.90E-01                           | 0.57322                              | 0.7593                             | 1.022                               | 5.68E-01                            | 0.5732                               | 8.83E-01                            |
| 1.061                               | 9.25E-02                           | 0.5996                               | 0.6347                             | 1.061                               | 2.94E-01                            | 0.5996                               | 1.01E+00                            |
| 1.114                               | 6.04E-02                           | 0.6272                               | 0.50745                            | 1.114                               | 3.27E-01                            | 0.6272                               | 7.52E-01                            |
| 1.167                               | 4.19E-02                           | 0.65606                              | 0.383455                           | 1.167                               | 7.06E-01                            | 0.6561                               | 5.83E-01                            |
| 1.22                                | 3.25E-02                           | 0.68626                              | 0.270225                           | 1.22                                | 1.01E+00                            | 0.6863                               | 2.54E-01                            |
| 1.273                               | 0.00E+00                           | 0.71786                              | 0.1679                             | 1.273                               | 8.76E-01                            | 0.7179                               | 2.28E-01                            |
| 1.326                               | 0.00E+00                           | 0.7509                               | 0.147255                           | 1.326                               | 6.10E-01                            | 0.7509                               | 4.48E-01                            |
| 1.379                               | 0.00E+00                           | 0.78546                              | 0.35348                            | 1.379                               | 3.49E-01                            | 0.7855                               | 6.36E-01                            |
| 1.432                               | 0.00E+00                           | 0.8216                               | 0.41477                            | 1.432                               | 1.27E-01                            | 0.8216                               | 9.93E-01                            |
| 1.498                               | 0.00E+00                           | 0.85942                              | 0.26453                            | 1.498                               | 1.54E-01                            | 0.8594                               | 9.59E-01                            |
| 1.564                               | 0.00E+00                           | 0.89898                              | 0.21521                            | 1.564                               | 1.47E-01                            | 0.899                                | 6.92E-01                            |
| 1.631                               | 0.00E+00                           | 0.94036                              | 0.192275                           | 1.631                               | 1.01E-01                            | 0.9404                               | 5.77E-01                            |
| 1.697                               | 0.00E+00                           | 0.98364                              | 0.178525                           | 1.697                               | 1.45E-01                            | 0.9836                               | 5.10E-01                            |

|       |          |         |          |       |          |        |          |
|-------|----------|---------|----------|-------|----------|--------|----------|
| 1.78  | 0.00E+00 | 1.02892 | 0.16912  | 1.78  | 8.92E-02 | 1.0289 | 4.63E-01 |
| 1.884 | 3.81E-02 | 1.07628 | 0.16231  | 1.884 | 3.03E-01 | 1.0763 | 4.39E-01 |
| 1.964 | 4.73E-02 | 1.12582 | 0.157215 | 1.964 | 3.99E-01 | 1.1258 | 4.02E-01 |
| 2.043 | 4.22E-02 | 1.17764 | 0.153245 | 2.043 | 3.60E-01 | 1.1776 | 3.96E-01 |
| 2.123 | 2.76E-02 | 1.23184 | 0.150095 | 2.123 | 3.36E-01 | 1.2318 | 3.87E-01 |
| 2.202 | 1.62E-02 | 1.28854 | 0.147675 | 2.202 | 3.00E-01 | 1.2885 | 3.68E-01 |
| 2.282 | 1.03E-02 | 1.34784 | 0.14567  | 2.282 | 2.79E-01 | 1.3478 | 3.53E-01 |
| 2.361 | 1.86E-02 | 1.40988 | 0.144115 | 2.361 | 3.33E-01 | 1.4099 | 3.55E-01 |
| 2.44  | 2.06E-02 | 1.47478 | 0.142835 | 2.44  | 2.59E-01 | 1.4748 | 3.55E-01 |
| 2.52  | 1.23E-02 |         |          | 2.52  | 2.57E-01 |        |          |
| 2.599 | 1.02E-02 |         |          | 2.599 | 2.71E-01 |        |          |
| 2.718 | 1.00E-02 |         |          | 2.718 | 1.62E-01 |        |          |
| 2.838 | 1.06E-02 |         |          | 2.838 | 1.68E-01 |        |          |
| 2.957 | 7.63E-03 |         |          | 2.957 | 1.50E-01 |        |          |
| 3.076 | 9.87E-03 |         |          | 3.076 | 1.25E-01 |        |          |
| 3.195 | 1.09E-02 |         |          | 3.195 | 1.38E-01 |        |          |
| 3.314 | 1.29E-02 |         |          | 3.314 | 1.33E-01 |        |          |
| 3.433 | 1.50E-02 |         |          | 3.433 | 1.84E-01 |        |          |
| 3.553 | 1.89E-02 |         |          | 3.553 | 2.59E-01 |        |          |
| 3.672 | 1.49E-02 |         |          | 3.672 | 1.88E-01 |        |          |
| 3.791 | 1.38E-02 |         |          | 3.791 | 1.67E-01 |        |          |
| 3.95  | 1.46E-02 |         |          | 3.95  | 1.36E-01 |        |          |
| 4.109 | 1.41E-02 |         |          | 4.109 | 1.07E-01 |        |          |
| 4.268 | 1.92E-02 |         |          | 4.268 | 8.82E-02 |        |          |
| 4.427 | 1.88E-02 |         |          | 4.427 | 7.96E-02 |        |          |
| 4.585 | 2.77E-02 |         |          | 4.585 | 9.43E-02 |        |          |
| 4.744 | 4.67E-02 |         |          | 4.744 | 1.13E-01 |        |          |
| 4.903 | 4.73E-02 |         |          | 4.903 | 1.11E-01 |        |          |
| 5.102 | 5.25E-02 |         |          | 5.102 | 8.62E-02 |        |          |
| 5.3   | 5.94E-02 |         |          | 5.3   | 8.37E-02 |        |          |
| 5.499 | 4.44E-02 |         |          | 5.499 | 6.14E-02 |        |          |
| 5.698 | 1.25E-02 |         |          | 5.698 | 1.45E-02 |        |          |
| 5.896 | 6.07E-03 |         |          | 5.896 | 6.74E-03 |        |          |
| 6.095 | 4.46E-03 |         |          | 6.095 | 4.78E-03 |        |          |
| 6.333 | 2.45E-03 |         |          | 6.333 | 3.01E-03 |        |          |
| 6.572 | 1.73E-03 |         |          | 6.572 | 2.75E-03 |        |          |
| 6.81  | 1.31E-03 |         |          | 6.81  | 2.20E-03 |        |          |
| 7.048 | 1.99E-03 |         |          | 7.048 | 1.78E-03 |        |          |
| 7.326 | 3.06E-03 |         |          | 7.326 | 9.68E-04 |        |          |
| 7.604 | 2.37E-03 |         |          | 7.604 | 6.73E-04 |        |          |
| 7.882 | 2.11E-03 |         |          | 7.882 | 5.20E-04 |        |          |
| 8.16  | 2.58E-03 |         |          | 8.16  | 2.18E-03 |        |          |

|        |          |        |          |
|--------|----------|--------|----------|
| 8.478  | 2.42E-03 | 8.478  | 2.45E-03 |
| 8.796  | 2.93E-03 | 8.796  | 2.89E-03 |
| 9.114  | 2.51E-03 | 9.114  | 2.71E-03 |
| 9.432  | 1.87E-03 | 9.432  | 2.19E-03 |
| 9.789  | 1.61E-03 | 9.789  | 1.92E-03 |
| 10.147 | 1.54E-03 | 10.147 | 1.78E-03 |
| 10.504 | 1.57E-03 | 10.504 | 1.90E-03 |
| 10.901 | 1.26E-03 | 10.901 | 1.64E-03 |
| 11.298 | 1.02E-03 | 11.298 | 1.37E-03 |
| 11.696 | 9.47E-04 | 11.696 | 1.22E-03 |
| 12.133 | 9.80E-04 | 12.133 | 1.31E-03 |
| 12.57  | 9.14E-04 | 12.57  | 1.19E-03 |
| 13.006 | 7.08E-04 | 13.006 | 1.05E-03 |
| 13.483 | 9.78E-04 | 13.483 | 1.63E-03 |
| 13.96  | 7.82E-04 | 13.96  | 1.28E-03 |
| 14.476 | 6.82E-04 | 14.476 | 1.13E-03 |
| 14.993 | 7.86E-04 | 14.993 | 1.29E-03 |
| 15.549 | 6.46E-04 | 15.549 | 1.06E-03 |
| 16.105 | 5.42E-04 | 16.105 | 8.90E-04 |
| 16.701 | 6.83E-04 | 16.701 | 1.25E-03 |
| 17.296 | 7.25E-04 | 17.296 | 1.53E-03 |
| 17.932 | 5.15E-04 | 17.932 | 1.09E-03 |
| 18.568 | 5.15E-04 | 18.568 | 1.11E-03 |
| 19.243 | 4.22E-04 | 19.243 | 8.70E-04 |
| 19.918 | 3.95E-04 | 19.918 | 8.44E-04 |
| 20.633 | 3.69E-04 | 20.633 | 7.66E-04 |
| 21.388 | 3.04E-04 | 21.388 | 6.37E-04 |
| 22.143 | 2.86E-04 | 22.143 | 5.90E-04 |
| 22.937 | 3.43E-04 | 22.937 | 7.22E-04 |
| 23.771 | 3.06E-04 | 23.771 | 6.29E-04 |
| 24.645 | 2.77E-04 | 24.645 | 6.86E-04 |
| 25.519 | 3.07E-04 | 25.519 | 9.44E-04 |
| 26.433 | 2.83E-04 | 26.433 | 8.66E-04 |
| 27.386 | 2.61E-04 | 27.386 | 8.01E-04 |
| 28.379 | 2.37E-04 | 28.379 | 7.36E-04 |
| 29.412 | 2.50E-04 | 29.412 | 7.63E-04 |
| 30.484 | 2.00E-04 | 30.484 | 6.25E-04 |
| 31.557 | 1.61E-04 | 31.557 | 4.84E-04 |
| 32.669 | 1.80E-04 | 32.669 | 5.56E-04 |
| 33.821 | 1.60E-04 | 33.821 | 4.85E-04 |
| 35.012 | 1.58E-04 | 35.012 | 4.84E-04 |
| 36.244 | 1.35E-04 | 36.244 | 4.12E-04 |

|        |          |        |          |
|--------|----------|--------|----------|
| 37.515 | 1.38E-04 | 37.515 | 4.18E-04 |
| 38.826 | 1.19E-04 | 38.826 | 3.67E-04 |
| 40.176 | 1.55E-03 | 40.176 | 8.23E-03 |

## Methods

### *Partitioning of the pore size distribution.*

Pore volumes were estimated by integration of the differential pore volume over limits that center around the pore width of interest. For example, the 8 Å pore volume was estimated as:

$$\int_{7.5 \text{ \AA}}^{8.5 \text{ \AA}} \psi_x dx$$

where  $\psi_x$  is the differential pore volume taken from Table S2. More appropriately, this integral can be approximated as the sum of cumulative pore volumes over the same integral. For 8 Å, this becomes:

$$\sum_{i=7.5 \text{ \AA}}^{i=8.5} \psi_i$$

Boundary definition for each pore is somewhat arbitrary, though an effort was made to ensure that the average of the upper and lower boundaries fell at or about the pore size of interest. Based on the PSDs provided in Table S2, the following boundaries were assumed:

**Table S3. Boundaries for PSD partitioning.**

| Pore Size (Å) | Lower limit | Upper Limit |
|---------------|-------------|-------------|
| 3.5           | 0           | 3.492       |
| 4             | 3.655       | 4.5772      |
| 5             | 4.788       | 5.0082      |
| 6             | 5.2388      | 6.272       |
| 7             | 6.5606      | 7.1786      |
| 8             | 7.509       | 8.216       |
| 9             | 8.5942      | 9.4036      |
| 10            | 9.8364      | 10.2892     |
| 12            | 10.7628     | 12.8854     |
| 14            | 13.4784     | 16.97       |
| 18            | 17.8        | 19.64       |
| 22            | 20.43       | 23.61       |
| 28            | 24.4        | 30.76       |
| 34            | 31.95       | 36.72       |
| 40            | 37.91       | 44.27       |
| 50            | 45.85       | 54.99       |
| 60            | 56.98       | 65.72       |
| 70            | 68.1        | 76.04       |

|     |        |        |
|-----|--------|--------|
| 80  | 78.82  | 84.78  |
| 90  | 87.96  | 94.32  |
| 100 | 97.89  | 105.04 |
| 120 | 109.01 | 130.06 |
| 140 | 134.83 | 144.76 |
| 160 | 149.93 | 167.01 |
| 180 | 172.96 | 192.43 |
| 200 | 199.18 | 401.76 |

---

Differential volumes marked in blue font taken from NLDFT carbon model based on CO<sub>2</sub> adsorption at 273K; differential volumes marked in red taken from the QSDFT carbon model based on N<sub>2</sub> physisorption at 77K.

Here, the PSD is truncated at 200 Å and all volumes greater than 200 Å are treated as a 200 Å pore. This is reasonable as at this width, fluid-fluid interactions dominate and the pore density is assumed as the bulk fluid density.

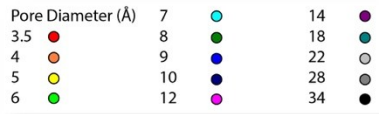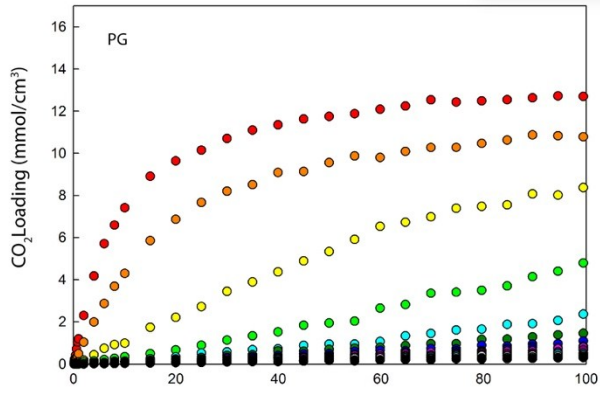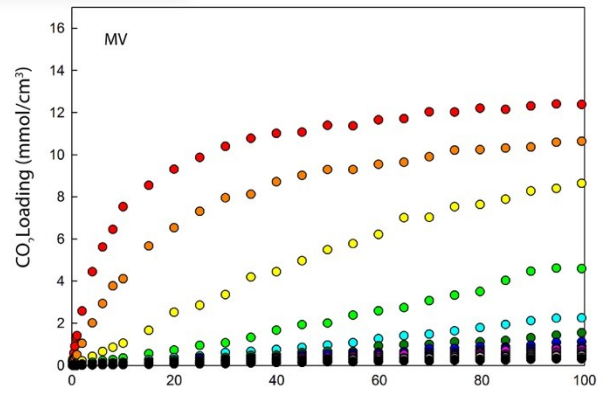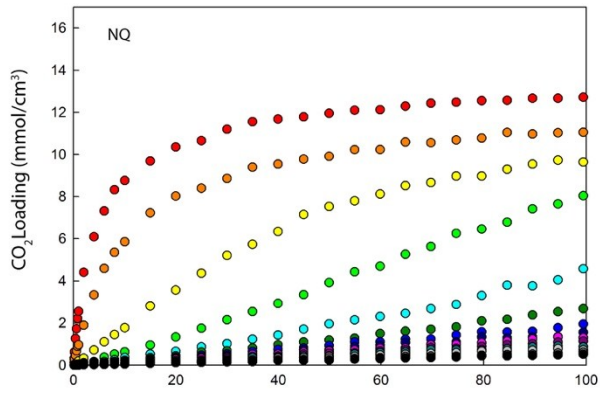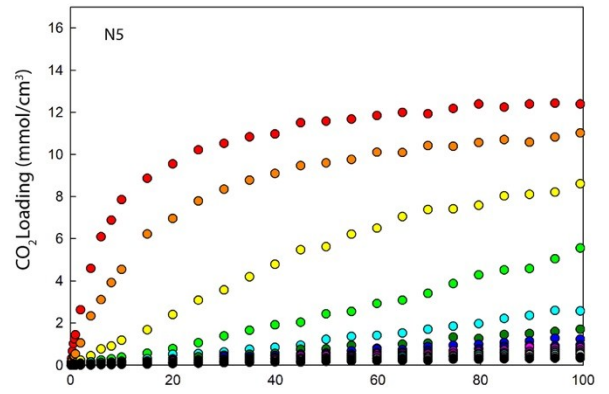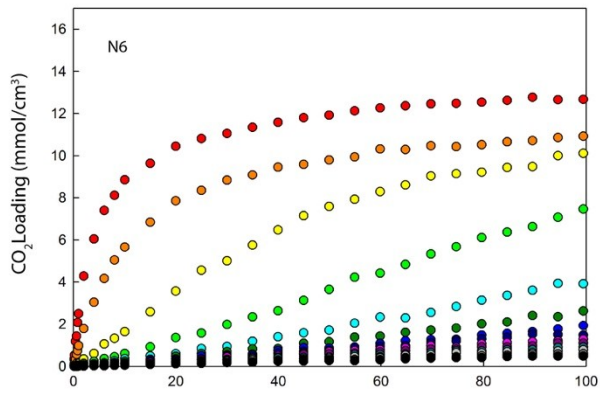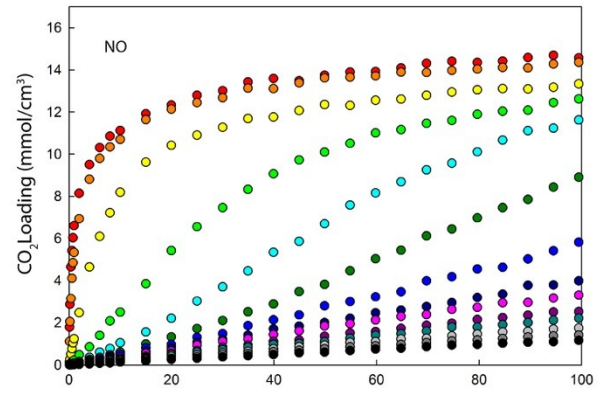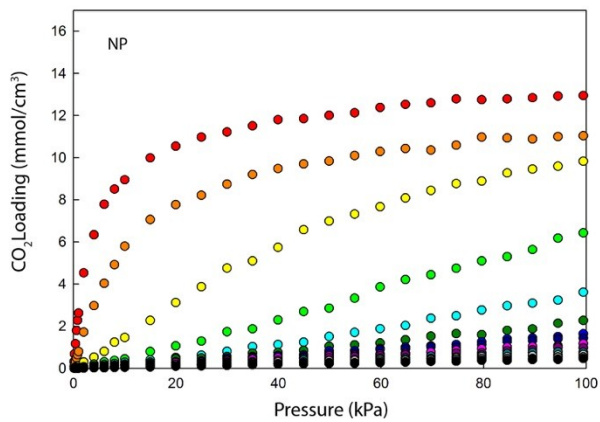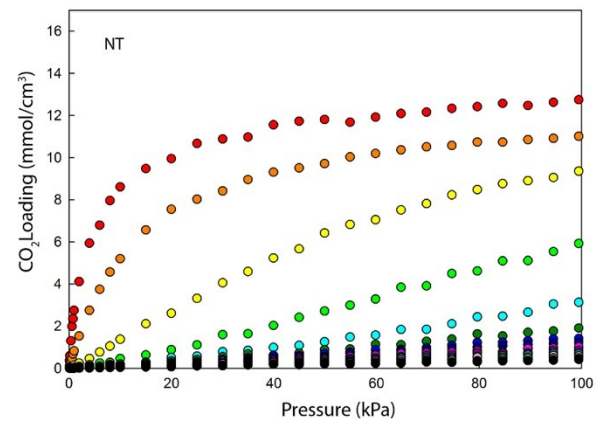

**Figure S1.** Volume normalized pore densities for the 8 surfaces under study (3.5 – 34 Å).

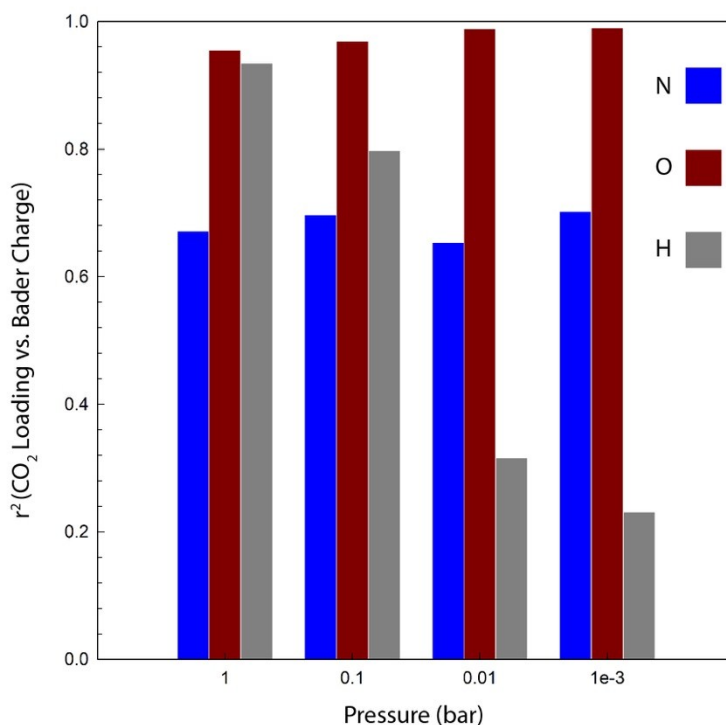

**Figure S2.** Correlation between Bader charge on select surface adatoms (N, O, and H) and CO<sub>2</sub> loading capacity, measured at 0.001, 0.01, 0.1, and 1 bar.

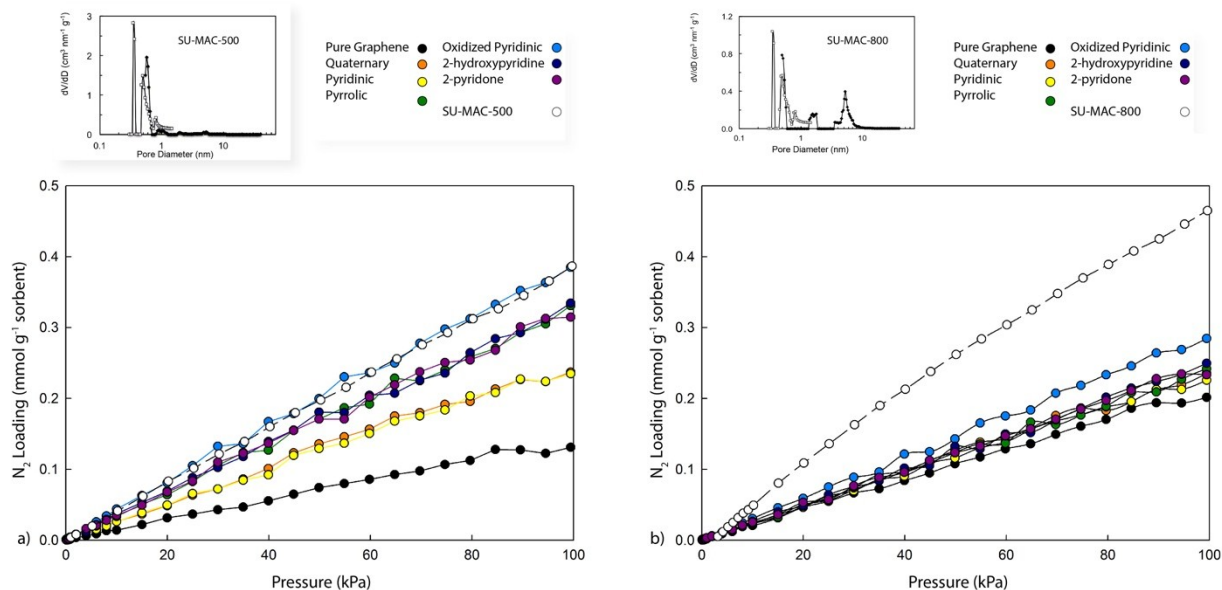

**Figure S3.** N<sub>2</sub> adsorption isotherms for the pure and N-modified surfaces. Isotherms are constructed as the weighted sum of individual slit-pore loading densities (excess), based on the pore-size distribution of a strong-performing hierarchical carbonaceous sorbent (inset).

### Method: Ideal Adsorbed Solution Theory (IAST) Selectivity



The IAST method can be used to predict the equilibrium adsorption of each component in a gas mixture from the pure (ideal) adsorption isotherms of each component. Typically, IAST predictions more accurately describe adsorption at working conditions as this method is not as vulnerable to surface energy heterogeneity as the Henry's Law method. Because this study deals with surface nitrogen substitution, a condition that necessarily introduces surface heterogeneity, the IAST method is chosen to calculate CO<sub>2</sub>/N<sub>2</sub> selectivity. Further, we assume that our gas-gas solution behaves ideally, and that the entire surface is equally accessible to all components. For more on IAST theory, readers are referred to the original work of Myers and Prausnitz(1), or the text *Principles of adsorption and adsorption processes*, (1984) (2). IAST selectivity calculations were calculated by the python code *pyIAST*, developed by Simon et al. (3). Readers are directed to the methodology outlined in the *pyIAST* user manual, accessible at: [http://corymsimon.com/portfolio\\_page/pyiast-ideal-adsorbed-solution-theory-iast-python-package/](http://corymsimon.com/portfolio_page/pyiast-ideal-adsorbed-solution-theory-iast-python-package/).

### VASP-optimized models: coordinates and Bader charges

| PURE GRAPHENE-PG       |   |   |   |        |   |                            |
|------------------------|---|---|---|--------|---|----------------------------|
| COORDINATES (ANGSTROM) |   |   |   |        |   |                            |
| ATOM                   | X | Y | Z | SYMBOL | Q |                            |
|                        |   |   |   |        |   | 12 6.1661 6.408 0.0002 C 0 |
|                        |   |   |   |        |   | 13 0 2.848 0.0001 C 0      |
|                        |   |   |   |        |   | 14 0 7.12 0.0001 C 0       |
|                        |   |   |   |        |   | 15 4.9329 2.848 0.0001 C 0 |
|                        |   |   |   |        |   | 16 4.9329 7.12 0.0001 C 0  |
|                        |   |   |   |        |   | 17 2.4664 8.544 0.0002 C 0 |
|                        |   |   |   |        |   | 18 2.4664 4.272 0.0002 C 0 |
|                        |   |   |   |        |   | 19 7.3993 8.544 0.0002 C 0 |
|                        |   |   |   |        |   | 20 7.3993 4.272 0.0002 C 0 |
|                        |   |   |   |        |   | 21 3.6997 0.712 0.0001 C 0 |
|                        |   |   |   |        |   | 22 3.6997 4.984 0.0001 C 0 |
|                        |   |   |   |        |   | 23 8.6325 0.712 0.0001 C 0 |
|                        |   |   |   |        |   | 24 8.6325 4.984 0.0001 C 0 |
|                        |   |   |   |        |   | 25 3.6997 2.136 0.0002 C 0 |
|                        |   |   |   |        |   | 26 3.6997 6.408 0.0002 C 0 |
|                        |   |   |   |        |   | 27 8.6325 2.136 0.0002 C 0 |

|    |        |        |        |   |   |    |        |        |        |   |   |
|----|--------|--------|--------|---|---|----|--------|--------|--------|---|---|
| 28 | 8.6325 | 6.408  | 0.0002 | C | 0 | 70 | 1.2332 | 4.9843 | 6.7119 | C | 0 |
| 29 | 2.4664 | 2.848  | 0.0001 | C | 0 | 71 | 6.1661 | 0.7123 | 6.7119 | C | 0 |
| 30 | 2.4664 | 7.12   | 0.0001 | C | 0 | 72 | 6.1661 | 4.9843 | 6.7119 | C | 0 |
| 31 | 7.3993 | 2.848  | 0.0001 | C | 0 | 73 | 1.2332 | 2.136  | 6.7103 | C | 0 |
| 32 | 7.3993 | 7.12   | 0.0001 | C | 0 | 74 | 1.2332 | 6.408  | 6.7103 | C | 0 |
| 33 | 0      | 0      | 3.35   | C | 0 | 75 | 6.1661 | 2.136  | 6.7103 | C | 0 |
| 34 | 0      | 4.272  | 3.35   | C | 0 | 76 | 6.1661 | 6.408  | 6.7103 | C | 0 |
| 35 | 4.9329 | 0      | 3.35   | C | 0 | 77 | 0      | 2.8483 | 6.7119 | C | 0 |
| 36 | 4.9329 | 4.272  | 3.35   | C | 0 | 78 | 0      | 7.1203 | 6.7119 | C | 0 |
| 37 | 0      | 1.424  | 3.35   | C | 0 | 79 | 4.9329 | 2.8483 | 6.7119 | C | 0 |
| 38 | 0      | 5.696  | 3.35   | C | 0 | 80 | 4.9329 | 7.1203 | 6.7119 | C | 0 |
| 39 | 4.9329 | 1.424  | 3.35   | C | 0 | 81 | 2.4664 | 0      | 6.7103 | C | 0 |
| 40 | 4.9329 | 5.696  | 3.35   | C | 0 | 82 | 2.4664 | 4.272  | 6.7103 | C | 0 |
| 41 | 1.2332 | 2.136  | 3.35   | C | 0 | 83 | 7.3993 | 0      | 6.7103 | C | 0 |
| 42 | 1.2332 | 6.408  | 3.35   | C | 0 | 84 | 7.3993 | 4.272  | 6.7103 | C | 0 |
| 43 | 6.1661 | 2.136  | 3.35   | C | 0 | 85 | 3.6997 | 0.7123 | 6.7119 | C | 0 |
| 44 | 6.1661 | 6.408  | 3.35   | C | 0 | 86 | 3.6997 | 4.9843 | 6.7119 | C | 0 |
| 45 | 1.2332 | 3.56   | 3.35   | C | 0 | 87 | 8.6325 | 0.7123 | 6.7119 | C | 0 |
| 46 | 1.2332 | 7.832  | 3.35   | C | 0 | 88 | 8.6325 | 4.9843 | 6.7119 | C | 0 |
| 47 | 6.1661 | 3.56   | 3.35   | C | 0 | 89 | 3.6997 | 2.136  | 6.7103 | C | 0 |
| 48 | 6.1661 | 7.832  | 3.35   | C | 0 | 90 | 3.6997 | 6.408  | 6.7103 | C | 0 |
| 49 | 2.4664 | 0      | 3.35   | C | 0 | 91 | 8.6325 | 2.136  | 6.7103 | C | 0 |
| 50 | 2.4664 | 4.272  | 3.35   | C | 0 | 92 | 8.6325 | 6.408  | 6.7103 | C | 0 |
| 51 | 7.3993 | 0      | 3.35   | C | 0 | 93 | 2.4664 | 2.8483 | 6.7119 | C | 0 |
| 52 | 7.3993 | 4.272  | 3.35   | C | 0 | 94 | 2.4664 | 7.1203 | 6.7119 | C | 0 |
| 53 | 2.4664 | 1.424  | 3.35   | C | 0 | 95 | 7.3993 | 2.8483 | 6.7119 | C | 0 |
| 54 | 2.4664 | 5.696  | 3.35   | C | 0 | 96 | 7.3993 | 7.1203 | 6.7119 | C | 0 |
| 55 | 7.3993 | 1.424  | 3.35   | C | 0 |    |        |        |        |   |   |
| 56 | 7.3993 | 5.696  | 3.35   | C | 0 |    |        |        |        |   |   |
| 57 | 3.6997 | 2.136  | 3.35   | C | 0 |    |        |        |        |   |   |
| 58 | 3.6997 | 6.408  | 3.35   | C | 0 |    |        |        |        |   |   |
| 59 | 8.6325 | 2.136  | 3.35   | C | 0 |    |        |        |        |   |   |
| 60 | 8.6325 | 6.408  | 3.35   | C | 0 |    |        |        |        |   |   |
| 61 | 3.6997 | 3.56   | 3.35   | C | 0 |    |        |        |        |   |   |
| 62 | 3.6997 | 7.832  | 3.35   | C | 0 |    |        |        |        |   |   |
| 63 | 8.6325 | 3.56   | 3.35   | C | 0 |    |        |        |        |   |   |
| 64 | 8.6325 | 7.832  | 3.35   | C | 0 |    |        |        |        |   |   |
| 65 | 0      | 0      | 6.7103 | C | 0 |    |        |        |        |   |   |
| 66 | 0      | 4.272  | 6.7103 | C | 0 |    |        |        |        |   |   |
| 67 | 4.9329 | 0      | 6.7103 | C | 0 |    |        |        |        |   |   |
| 68 | 4.9329 | 4.272  | 6.7103 | C | 0 |    |        |        |        |   |   |
| 69 | 1.2332 | 0.7123 | 6.7119 | C | 0 |    |        |        |        |   |   |

---

MONO-VACANCY GRAPHENE-MV

COORDINATES (ANGSTROM)

| ATOM | X      | Y      | Z      | SYMBOL | Q       |
|------|--------|--------|--------|--------|---------|
| 1    | 4.9329 | 8.542  | 0.0167 | C      | -0.019  |
| 2    | 0      | 8.542  | 0.0168 | C      | -0.019  |
| 3    | 0      | 4.27   | 0.0168 | C      | -0.019  |
| 4    | 4.9329 | 4.27   | 0.0165 | C      | -0.0189 |
| 5    | 6.1661 | 4.982  | 0.0158 | C      | 0.0354  |
| 6    | 6.1661 | 0.71   | 0.0158 | C      | 0.0353  |
| 7    | 1.2332 | 0.71   | 0.0159 | C      | 0.0353  |
| 8    | 1.2332 | 4.982  | 0.0159 | C      | 0.0353  |
| 9    | 6.1662 | 2.1341 | 0.016  | C      | -0.0435 |
| 10   | 1.2333 | 2.1341 | 0.0161 | C      | -0.0436 |

|    |        |        |        |   |         |    |        |        |        |   |         |
|----|--------|--------|--------|---|---------|----|--------|--------|--------|---|---------|
| 11 | 1.2333 | 6.4061 | 0.0161 | C | -0.0436 | 53 | 7.3993 | 1.4246 | 3.3503 | C | 0.0334  |
| 12 | 6.1662 | 6.4061 | 0.016  | C | -0.0436 | 54 | 2.4665 | 1.4246 | 3.3503 | C | 0.0334  |
| 13 | 0      | 7.118  | 0.0163 | C | 0.0595  | 55 | 2.4666 | 5.6964 | 3.3512 | C | 0.0351  |
| 14 | 4.9329 | 2.846  | 0.016  | C | 0.0597  | 56 | 7.3991 | 5.6964 | 3.3512 | C | 0.0351  |
| 15 | 4.9329 | 7.118  | 0.0161 | C | 0.0597  | 57 | 8.6324 | 2.1364 | 3.3498 | C | -0.0477 |
| 16 | 0      | 2.846  | 0.0163 | C | 0.0595  | 58 | 8.6322 | 6.4085 | 3.3508 | C | -0.0485 |
| 17 | 2.4665 | 8.542  | 0.0168 | C | -0.05   | 59 | 3.6994 | 2.137  | 3.3505 | C | -0.0451 |
| 18 | 2.4664 | 4.2701 | 0.0168 | C | -0.05   | 60 | 3.6997 | 6.4087 | 3.3503 | C | -0.0468 |
| 19 | 7.3993 | 8.542  | 0.0168 | C | -0.05   | 61 | 3.6996 | 3.5607 | 3.3515 | C | 0.0395  |
| 20 | 7.3993 | 4.2701 | 0.0168 | C | -0.05   | 62 | 8.6324 | 3.5604 | 3.3506 | C | 0.0384  |
| 21 | 3.6996 | 4.982  | 0.0158 | C | 0.0354  | 63 | 3.6997 | 7.8327 | 3.3506 | C | 0.037   |
| 22 | 8.6325 | 4.982  | 0.0159 | C | 0.0353  | 64 | 8.6325 | 7.8326 | 3.351  | C | 0.0375  |
| 23 | 3.6996 | 0.71   | 0.0158 | C | 0.0353  | 65 | 4.9329 | 0.0112 | 6.6925 | C | 0.0386  |
| 24 | 8.6325 | 0.71   | 0.0159 | C | 0.0353  | 66 | 0      | 4.2645 | 6.6935 | C | 0.0009  |
| 25 | 8.6325 | 2.1341 | 0.0161 | C | -0.0436 | 67 | 0      | 8.5362 | 6.6931 | C | -0.0143 |
| 26 | 3.6996 | 2.1341 | 0.016  | C | -0.0435 | 68 | 6.2156 | 4.9882 | 6.6982 | C | -0.1475 |
| 27 | 8.6325 | 6.4061 | 0.0161 | C | -0.0436 | 69 | 1.2358 | 0.6999 | 6.6921 | C | 0.0198  |
| 28 | 3.6996 | 6.4061 | 0.016  | C | -0.0436 | 70 | 1.2322 | 4.9866 | 6.6948 | C | -0.0325 |
| 29 | 2.4664 | 7.1183 | 0.0158 | C | 0.0297  | 71 | 6.1553 | 0.7362 | 6.6931 | C | 0.0342  |
| 30 | 7.3993 | 2.8463 | 0.0157 | C | 0.0296  | 72 | 6.1572 | 2.1882 | 6.6934 | C | -0.0122 |
| 31 | 2.4664 | 2.8463 | 0.0157 | C | 0.0296  | 73 | 1.2322 | 2.1278 | 6.6913 | C | 0.0056  |
| 32 | 7.3993 | 7.1183 | 0.0158 | C | 0.0297  | 74 | 1.2396 | 6.4071 | 6.6948 | C | 0.0409  |
| 33 | 0      | 4.2725 | 3.3512 | C | -0.0238 | 75 | 6.1389 | 6.382  | 6.6946 | C | 0.0263  |
| 34 | 4.9329 | 4.2728 | 3.354  | C | -0.0198 | 76 | 4.9329 | 7.1307 | 6.692  | C | 0.0408  |
| 35 | 0      | 0.0006 | 3.3511 | C | -0.0229 | 77 | 4.9329 | 2.8705 | 6.6909 | C | -0.1027 |
| 36 | 4.9329 | 0.0011 | 3.3508 | C | -0.0207 | 78 | 0      | 7.1174 | 6.6945 | C | 0.0619  |
| 37 | 0      | 1.4246 | 3.3508 | C | 0.0618  | 79 | 0      | 2.8413 | 6.6916 | C | -0.0059 |
| 38 | 0      | 5.6966 | 3.3513 | C | 0.0613  | 80 | 7.3868 | 0.0056 | 6.6932 | C | 0.0382  |
| 39 | 4.9329 | 5.6967 | 3.3516 | C | 0.0658  | 81 | 7.388  | 4.2585 | 6.6957 | C | 0.0301  |
| 40 | 4.9329 | 1.425  | 3.3516 | C | 0.0617  | 82 | 2.4789 | 0.0056 | 6.6932 | C | 0.0382  |
| 41 | 1.2334 | 2.1364 | 3.3498 | C | -0.0477 | 83 | 2.4777 | 4.2585 | 6.6957 | C | 0.0301  |
| 42 | 1.2336 | 6.4085 | 3.3508 | C | -0.0485 | 84 | 3.6501 | 4.9882 | 6.6982 | C | -0.1575 |
| 43 | 6.1663 | 2.137  | 3.3505 | C | -0.0451 | 85 | 8.6299 | 0.6999 | 6.6921 | C | 0.0198  |
| 44 | 6.1661 | 6.4087 | 3.3503 | C | -0.0468 | 86 | 3.7105 | 0.7362 | 6.6931 | C | 0.0342  |
| 45 | 6.1661 | 3.5607 | 3.3515 | C | 0.0395  | 87 | 8.6336 | 4.9866 | 6.6948 | C | -0.0325 |
| 46 | 6.1661 | 7.8327 | 3.3506 | C | 0.037   | 88 | 8.6336 | 2.1278 | 6.6913 | C | 0.0056  |
| 47 | 1.2333 | 3.5604 | 3.3506 | C | 0.0384  | 89 | 8.6261 | 6.4071 | 6.6948 | C | 0.0409  |
| 48 | 1.2333 | 7.8326 | 3.351  | C | 0.0375  | 90 | 3.7086 | 2.1882 | 6.6934 | C | -0.0122 |
| 49 | 7.3991 | 0.0006 | 3.3509 | C | -0.0518 | 91 | 3.7269 | 6.382  | 6.6946 | C | 0.0263  |
| 50 | 7.3991 | 4.2723 | 3.3512 | C | -0.0514 | 92 | 7.4173 | 2.8386 | 6.6927 | C | 0.0086  |
| 51 | 2.4666 | 0.0006 | 3.3509 | C | -0.0518 | 93 | 7.3899 | 7.1138 | 6.6946 | C | -0.0351 |
| 52 | 2.4666 | 4.2723 | 3.3512 | C | -0.0514 | 94 | 2.4485 | 2.8386 | 6.6927 | C | 0.0086  |

95 2.4758 7.1138 6.6946 C -0.0351

37 7.3921 8.4807 3.3494 C 0.0191

38 7.3921 4.2085 3.351 C 0.0196

39 2.4593 4.2082 3.3532 C 0.0264

PYRIDINIC NITROGEN-N6

40 2.4593 8.4808 3.3509 C 0.0212

COORDINATES (ANGSTROM)

41 8.6252 0.6485 3.3491 C -0.0108

ATOM X Y Z SYMBOL Q

42 8.6255 4.9204 3.3503 C -0.0114

1 2.4603 7.0533 0.0343 C 0.0045

43 3.6923 0.6491 3.3514 C -0.007

2 7.3933 7.0534 0.0344 C 0.0041

44 3.692 4.9204 3.3529 C -0.0095

3 7.3932 2.7814 0.0345 C 0.0042

45 3.692 2.0729 3.3535 C 0.0058

4 2.4603 2.7813 0.0343 C 0.0044

46 3.692 6.3447 3.3513 C 0.0032

5 3.6934 3.4934 0.0338 C -0.0155

47 8.6252 2.0724 3.3501 C 0.0032

6 3.6935 7.7654 0.0336 C -0.0158

48 8.625 6.3444 3.3495 C 0.0035

7 8.6264 7.7654 0.0337 C -0.0157

49 4.9249 7.0568 3.3505 C -0.0116

8 8.6264 3.4934 0.0337 C -0.0157

50 4.9249 2.7844 3.3532 C -0.0105

9 3.6934 0.6454 0.0339 C 0.004

51 9.8583 7.0567 3.3497 C -0.011

10 8.6262 0.6453 0.034 C 0.004

52 9.8585 2.7843 3.3517 C -0.0092

11 8.6262 4.9173 0.034 C 0.004

53 4.9253 8.481 3.3502 C 0.0026

12 3.6933 4.9174 0.0341 C 0.0042

54 9.8587 8.4809 3.3497 C 0.003

13 7.3932 5.6294 0.0336 C -0.0119

55 9.859 4.2086 3.3513 C 0.0063

14 2.4603 1.3574 0.0333 C -0.0116

56 4.9252 4.2087 3.3535 C 0.0038

15 2.4603 5.6295 0.0335 C -0.0118

57 6.1588 0.6486 3.3497 C -0.0084

16 7.3932 1.3574 0.0335 C -0.0118

58 6.1589 4.9205 3.3517 C -0.0099

17 9.8597 7.0533 0.0333 C 0.0077

59 1.2259 0.6491 3.3512 C -0.0054

18 9.8597 2.7813 0.0333 C 0.0078

60 1.2262 4.9205 3.3513 C -0.008

19 4.9269 7.0533 0.0334 C 0.0077

61 1.226 2.0729 3.3525 C 0.0266

20 4.9268 2.7813 0.0335 C 0.0078

62 6.1585 2.0726 3.3508 C 0.0244

21 1.2273 3.4932 0.033 C 0.0091

63 1.2259 6.3446 3.3499 C 0.0249

22 6.1601 3.4933 0.0332 C 0.0087

64 6.1586 6.3447 3.3504 C 0.0241

23 1.2273 7.7653 0.0329 C 0.009

65 2.4582 7.0405 6.6776 C 0.0234

24 6.1602 7.7653 0.0331 C 0.009

66 7.4115 2.7833 6.6769 C 0.0275

25 6.1602 0.6453 0.0333 C 0.0277

67 7.3878 7.0554 6.677 C 0.0099

26 1.2272 0.6453 0.0331 C 0.0276

68 8.6291 7.7123 6.6754 C 0.0125

27 6.1602 4.9173 0.0335 C 0.0278

69 8.6582 3.4671 6.679 C -0.0311

28 1.2272 4.9173 0.0332 C 0.0277

70 3.6307 7.8736 6.6783 C -0.0068

29 9.8597 5.6291 0.0327 C -0.0148

71 3.5539 0.8346 6.6774 C 0.0074

30 4.9267 1.3571 0.0328 C -0.0147

72 8.5713 0.5995 6.6742 C 0.0002

31 9.8597 1.3571 0.0327 C -0.0146

73 8.6761 4.8897 6.6787 C 0.0167

32 4.9267 5.6292 0.0329 C -0.0148

74 3.7948 4.9292 6.6691 C 0.6002

33 7.392 2.7843 3.3509 C -0.0128

75 2.5096 5.5768 6.6739 C -0.0337

34 2.459 2.7848 3.3562 C -0.003

76 2.2298 1.5666 6.6787 C -0.002

35 7.3918 7.0565 3.3497 C -0.0124

77 7.438 5.6384 6.6781 C -0.0323

36 2.4588 7.0571 3.3504 C -0.0101

78 7.3513 1.3619 6.6739 C 0.0022

|    |        |        |        |   |         |    |        |        |        |   |         |
|----|--------|--------|--------|---|---------|----|--------|--------|--------|---|---------|
| 79 | 4.8995 | 7.1456 | 6.6785 | C | -0.0148 | 21 | 3.6999 | 0.7107 | 0.0119 | C | 0.0362  |
| 80 | 4.9489 | 2.8908 | 6.668  | C | 0.5442  | 22 | 3.6999 | 4.9827 | 0.0116 | C | 0.0359  |
| 81 | 0.0205 | 6.9821 | 6.6757 | C | -0.015  | 23 | 8.6327 | 0.7107 | 0.0118 | C | 0.0361  |
| 82 | 9.8639 | 2.7039 | 6.6779 | C | 0.0428  | 24 | 8.6327 | 4.9827 | 0.0118 | C | 0.0361  |
| 83 | 1.3278 | 3.1814 | 6.6786 | C | 0.0156  | 25 | 3.6998 | 2.1347 | 0.012  | C | -0.0465 |
| 84 | 6.1384 | 7.8115 | 6.6771 | C | 0.0107  | 26 | 3.6998 | 6.4067 | 0.0118 | C | -0.0469 |
| 85 | 1.2214 | 7.7457 | 6.677  | C | 0.0317  | 27 | 8.6327 | 2.1347 | 0.012  | C | -0.0468 |
| 86 | 6.204  | 3.5414 | 6.6764 | C | -0.0033 | 28 | 8.6327 | 6.4067 | 0.012  | C | -0.0468 |
| 87 | 6.0928 | 0.6979 | 6.6739 | C | -0.0248 | 29 | 2.4667 | 2.8469 | 0.0118 | C | 0.0323  |
| 88 | 6.1991 | 4.965  | 6.6769 | C | 0.0011  | 30 | 2.4667 | 7.1188 | 0.0118 | C | 0.0324  |
| 89 | 1.1617 | 0.6417 | 6.6777 | C | -0.0267 | 31 | 7.3996 | 2.8468 | 0.0118 | C | 0.0323  |
| 90 | 1.3516 | 4.7176 | 6.6773 | C | -0.0099 | 32 | 7.3996 | 7.1189 | 0.0119 | C | 0.0323  |
| 91 | 4.8587 | 1.4476 | 6.6719 | C | 0.0238  | 33 | 9.8656 | 0.0006 | 3.3525 | C | -0.0223 |
| 92 | 4.9714 | 5.7061 | 6.6771 | C | 0.0022  | 34 | 0.0001 | 4.2728 | 3.3518 | C | -0.0215 |
| 93 | 9.7693 | 1.2918 | 6.6759 | C | -0.0302 | 35 | 4.9328 | 0.0009 | 3.3552 | C | -0.02   |
| 94 | 0.0804 | 5.5194 | 6.678  | C | 0.0104  | 36 | 4.9329 | 4.2729 | 3.3521 | C | -0.0199 |
| 95 | 3.8171 | 3.5954 | 6.6567 | N | -1.2612 | 37 | 0      | 1.4247 | 3.3524 | C | 0.0627  |

PYROLLIC NITROGEN-N5

COORDINATES (ANGSTROM)

| ATOM | X      | Y      | Z      | SYMBOL | Q       |    |        |        |        |   |         |
|------|--------|--------|--------|--------|---------|----|--------|--------|--------|---|---------|
| 1    | 0.0003 | 8.5427 | 0.0129 | C      | -0.0212 | 41 | 1.2334 | 2.1368 | 3.3526 | C | -0.0458 |
| 2    | 0.0003 | 4.2707 | 0.0129 | C      | -0.0213 | 42 | 1.2333 | 6.4088 | 3.3499 | C | -0.0461 |
| 3    | 4.9331 | 8.5427 | 0.013  | C      | -0.0213 | 43 | 6.1662 | 2.1368 | 3.3521 | C | -0.0459 |
| 4    | 4.9331 | 4.2707 | 0.0127 | C      | -0.021  | 44 | 6.1662 | 6.4088 | 3.3515 | C | -0.0461 |
| 5    | 1.2336 | 0.7107 | 0.012  | C      | 0.0369  | 45 | 1.2334 | 3.5609 | 3.3514 | C | 0.0387  |
| 6    | 1.2336 | 4.9827 | 0.0118 | C      | 0.037   | 46 | 1.2331 | 7.8328 | 3.3512 | C | 0.0386  |
| 7    | 6.1665 | 0.7107 | 0.0119 | C      | 0.0369  | 47 | 6.166  | 3.5608 | 3.3515 | C | 0.039   |
| 8    | 6.1664 | 4.9827 | 0.0118 | C      | 0.0369  | 48 | 6.166  | 7.8327 | 3.3523 | C | 0.0395  |
| 9    | 1.2336 | 2.1347 | 0.0121 | C      | -0.0464 | 49 | 2.4662 | 0.0008 | 3.3534 | C | -0.0503 |
| 10   | 1.2336 | 6.4067 | 0.012  | C      | -0.0466 | 50 | 2.4664 | 4.2729 | 3.3513 | C | -0.0502 |
| 11   | 6.1665 | 2.1347 | 0.012  | C      | -0.0464 | 51 | 7.3991 | 0.0005 | 3.3526 | C | -0.0514 |
| 12   | 6.1665 | 6.4067 | 0.012  | C      | -0.0465 | 52 | 7.3992 | 4.2727 | 3.3515 | C | -0.0508 |
| 13   | 0.0003 | 2.8466 | 0.0122 | C      | 0.063   | 53 | 2.4664 | 1.4248 | 3.3538 | C | 0.0355  |
| 14   | 0.0003 | 7.1186 | 0.0121 | C      | 0.063   | 54 | 2.4663 | 5.6968 | 3.3497 | C | 0.0353  |
| 15   | 4.9332 | 2.8466 | 0.0121 | C      | 0.0629  | 55 | 7.3992 | 1.4246 | 3.352  | C | 0.0334  |
| 16   | 4.9332 | 7.1186 | 0.0121 | C      | 0.0631  | 56 | 7.3992 | 5.6966 | 3.3511 | C | 0.034   |
| 17   | 2.4667 | 8.5427 | 0.0127 | C      | -0.05   | 57 | 3.6996 | 2.1371 | 3.355  | C | -0.0443 |
| 18   | 2.4667 | 4.2707 | 0.0125 | C      | -0.0501 | 58 | 3.6993 | 6.4091 | 3.3503 | C | -0.0454 |
| 19   | 7.3996 | 8.5427 | 0.0127 | C      | -0.0501 | 59 | 8.6324 | 2.1367 | 3.352  | C | -0.047  |
| 20   | 7.3996 | 4.2707 | 0.0126 | C      | -0.0501 | 60 | 8.6323 | 6.4087 | 3.3514 | C | -0.0466 |
|      |        |        |        |        |         | 61 | 3.6996 | 3.5608 | 3.353  | C | 0.0391  |
|      |        |        |        |        |         | 62 | 3.6994 | 7.8327 | 3.3525 | C | 0.0395  |

|    |        |        |        |   |         |    |        |        |        |   |         |
|----|--------|--------|--------|---|---------|----|--------|--------|--------|---|---------|
| 63 | 8.6325 | 3.5607 | 3.3516 | C | 0.0381  | 4  | 4.9329 | 4.2709 | 0.0171 | C | -0.0223 |
| 64 | 8.6323 | 7.8326 | 3.3521 | C | 0.0389  | 5  | 1.2332 | 4.9829 | 0.0162 | C | 0.0347  |
| 65 | 9.8119 | 8.5122 | 6.6952 | C | 0.0087  | 6  | 6.1661 | 0.7109 | 0.016  | C | 0.0347  |
| 66 | 0.0232 | 4.2966 | 6.6977 | C | -0.0154 | 7  | 1.2332 | 0.7109 | 0.016  | C | 0.0344  |
| 67 | 5.0649 | 8.4618 | 6.6859 | C | -0.1477 | 8  | 6.1661 | 4.9829 | 0.0162 | C | 0.0348  |
| 68 | 4.9689 | 4.2999 | 6.6966 | C | 0.026   | 9  | 1.2332 | 2.1349 | 0.0161 | C | -0.048  |
| 69 | 1.1043 | 0.7198 | 6.6948 | C | -0.0352 | 10 | 1.2332 | 6.4069 | 0.0162 | C | -0.048  |
| 70 | 1.3003 | 4.9552 | 6.6989 | C | -0.0277 | 11 | 6.1661 | 2.1349 | 0.0161 | C | -0.0479 |
| 71 | 6.1723 | 0.6832 | 6.6933 | C | -0.0732 | 12 | 6.1661 | 6.4069 | 0.0162 | C | -0.0478 |
| 72 | 6.2124 | 4.9932 | 6.6991 | C | -0.0476 | 13 | 9.8657 | 2.8469 | 0.0161 | C | 0.0598  |
| 73 | 1.1037 | 2.131  | 6.6959 | C | 0.0416  | 14 | 9.8658 | 7.1189 | 0.0161 | C | 0.0598  |
| 74 | 1.3003 | 6.4391 | 6.6977 | C | 0.0219  | 15 | 4.9329 | 2.847  | 0.0162 | C | 0.0598  |
| 75 | 6.1718 | 2.166  | 6.6951 | C | 0.0066  | 16 | 4.9329 | 7.1189 | 0.0163 | C | 0.0597  |
| 76 | 6.2119 | 6.3994 | 6.6973 | C | 0.0435  | 17 | 2.4664 | 4.2709 | 0.0171 | C | -0.0523 |
| 77 | 9.8124 | 2.8811 | 6.6984 | C | 0.015   | 18 | 7.3993 | 8.5429 | 0.0168 | C | -0.0522 |
| 78 | 0.0227 | 7.0971 | 6.6961 | C | 0.0011  | 19 | 7.3993 | 4.2709 | 0.0169 | C | -0.0522 |
| 79 | 5.0641 | 2.9304 | 6.6892 | C | -0.1476 | 20 | 2.4664 | 8.5429 | 0.017  | C | -0.0522 |
| 80 | 4.9693 | 7.0927 | 6.694  | C | 0.0294  | 21 | 8.6325 | 4.9829 | 0.0161 | C | 0.0347  |
| 81 | 2.3947 | 0.2134 | 6.6975 | C | 0.3091  | 22 | 3.6997 | 0.7109 | 0.0163 | C | 0.0346  |
| 82 | 2.5193 | 4.1527 | 6.6992 | C | 0.0107  | 23 | 3.6997 | 4.9829 | 0.0162 | C | 0.0347  |
| 83 | 7.4125 | 8.5364 | 6.6982 | C | 0.0151  | 24 | 8.6325 | 0.7109 | 0.0159 | C | 0.0345  |
| 84 | 7.4288 | 4.2748 | 6.6995 | C | 0.014   | 25 | 3.6997 | 2.1349 | 0.0163 | C | -0.048  |
| 85 | 3.702  | 4.9727 | 6.699  | C | -0.0211 | 26 | 3.6997 | 6.4069 | 0.0163 | C | -0.048  |
| 86 | 8.6135 | 0.7078 | 6.6981 | C | -0.0571 | 27 | 8.6325 | 2.1349 | 0.016  | C | -0.0479 |
| 87 | 8.6589 | 4.9923 | 6.6979 | C | -0.0391 | 28 | 8.6325 | 6.4069 | 0.0162 | C | -0.0479 |
| 88 | 3.7012 | 6.4205 | 6.6979 | C | 0.0601  | 29 | 7.3993 | 2.8469 | 0.0161 | C | 0.0311  |
| 89 | 8.6131 | 2.1413 | 6.6996 | C | 0.0304  | 30 | 2.4664 | 2.847  | 0.0162 | C | 0.0312  |
| 90 | 8.6587 | 6.4008 | 6.6961 | C | 0.0615  | 31 | 7.3993 | 7.1189 | 0.0161 | C | 0.0312  |
| 91 | 2.3949 | 2.6377 | 6.6989 | C | 0.3095  | 32 | 2.4664 | 7.1189 | 0.0163 | C | 0.0312  |
| 92 | 2.5194 | 7.2418 | 6.699  | C | 0.0129  | 33 | 4.9331 | 4.2731 | 3.3532 | C | -0.0234 |
| 93 | 7.4123 | 2.8566 | 6.7008 | C | 0.0162  | 34 | 9.8656 | 0.0009 | 3.3523 | C | -0.0231 |
| 94 | 7.4291 | 7.118  | 6.6972 | C | 0.0161  | 35 | 9.8656 | 4.273  | 3.353  | C | -0.0227 |
| 95 | 4.2082 | 1.4206 | 6.7009 | H | 0.4579  | 36 | 4.9332 | 0.0009 | 3.3534 | C | -0.0274 |
| 96 | 3.1675 | 1.425  | 6.7028 | N | -0.9579 | 37 | 9.8656 | 5.697  | 3.3531 | C | 0.0607  |
|    |        |        |        |   |         | 38 | 4.9332 | 1.4252 | 3.353  | C | 0.0546  |
|    |        |        |        |   |         | 39 | 9.8656 | 1.4249 | 3.3516 | C | 0.0598  |
|    |        |        |        |   |         | 40 | 4.9331 | 5.697  | 3.3531 | C | 0.0595  |
|    |        |        |        |   |         | 41 | 1.233  | 6.4088 | 3.3526 | C | -0.0499 |
|    |        |        |        |   |         | 42 | 6.1665 | 2.1372 | 3.3517 | C | -0.0488 |
|    |        |        |        |   |         | 43 | 6.1663 | 6.4088 | 3.3526 | C | -0.0496 |
|    |        |        |        |   |         | 44 | 1.2328 | 2.1372 | 3.3517 | C | -0.0492 |
|    |        |        |        |   |         | 45 | 6.1665 | 7.8328 | 3.3529 | C | 0.0339  |

QUATERNARY NITROGEN-NQ

COORDINATES (ANGSTROM)

| ATOM | X      | Y      | Z      | SYMBOL | Q       |
|------|--------|--------|--------|--------|---------|
| 1    | 4.9329 | 8.5429 | 0.017  | C      | -0.0223 |
| 2    | 9.8657 | 8.5429 | 0.0168 | C      | -0.0218 |
| 3    | 9.8658 | 4.2709 | 0.0169 | C      | -0.0222 |







|    |        |        |        |   |         |    |        |        |        |   |         |
|----|--------|--------|--------|---|---------|----|--------|--------|--------|---|---------|
| 12 | 6.1663 | 6.4067 | 0.0101 | C | -0.0472 | 54 | 2.4662 | 5.6969 | 3.3485 | C | 0.0326  |
| 13 | 0.0001 | 2.8467 | 0.0102 | C | 0.0624  | 55 | 7.3994 | 1.425  | 3.3505 | C | 0.0316  |
| 14 | 0.0001 | 7.1187 | 0.0102 | C | 0.0624  | 56 | 2.4661 | 1.4251 | 3.3501 | C | 0.0352  |
| 15 | 4.933  | 2.8467 | 0.0101 | C | 0.062   | 57 | 8.6323 | 6.4093 | 3.3513 | C | -0.0449 |
| 16 | 4.9329 | 7.1187 | 0.0101 | C | 0.0622  | 58 | 3.699  | 2.1369 | 3.3493 | C | -0.0478 |
| 17 | 7.3994 | 4.2708 | 0.0106 | C | -0.0511 | 59 | 8.6324 | 2.1375 | 3.3508 | C | -0.0448 |
| 18 | 2.4665 | 8.5428 | 0.0107 | C | -0.0509 | 60 | 3.6995 | 6.4088 | 3.3481 | C | -0.0486 |
| 19 | 2.4665 | 4.2707 | 0.0106 | C | -0.0511 | 61 | 8.6325 | 7.8333 | 3.3514 | C | 0.0356  |
| 20 | 7.3994 | 8.5427 | 0.0107 | C | -0.0508 | 62 | 8.6325 | 3.5615 | 3.351  | C | 0.0352  |
| 21 | 8.6326 | 0.7107 | 0.0099 | C | 0.036   | 63 | 3.6994 | 3.561  | 3.3491 | C | 0.0293  |
| 22 | 3.6997 | 0.7107 | 0.0099 | C | 0.0359  | 64 | 3.6994 | 7.8328 | 3.3493 | C | 0.0356  |
| 23 | 8.6326 | 4.9827 | 0.0099 | C | 0.036   | 65 | 0.0961 | 0.2075 | 6.6999 | C | 0.0407  |
| 24 | 3.6997 | 4.9827 | 0.0097 | C | 0.036   | 66 | 5.0546 | 8.3262 | 6.7009 | C | 0.0012  |
| 25 | 3.6996 | 2.1347 | 0.0102 | C | -0.0475 | 67 | 9.7441 | 4.3926 | 6.6965 | C | -0.0103 |
| 26 | 3.6996 | 6.4067 | 0.0102 | C | -0.0475 | 68 | 1.3779 | 0.9395 | 6.7025 | C | 0.0131  |
| 27 | 8.6325 | 2.1347 | 0.0103 | C | -0.047  | 69 | 6.2067 | 0.682  | 6.7016 | C | 0.0463  |
| 28 | 8.6325 | 6.4067 | 0.0103 | C | -0.047  | 70 | 1.1404 | 5.0056 | 6.6991 | C | 0.0154  |
| 29 | 7.3994 | 2.8469 | 0.0099 | C | 0.0319  | 71 | 6.1482 | 2.1633 | 6.702  | C | 0.0161  |
| 30 | 2.4665 | 2.8469 | 0.0098 | C | 0.0323  | 72 | 6.4055 | 6.147  | 6.7014 | C | -0.1437 |
| 31 | 7.3994 | 7.1188 | 0.0099 | C | 0.032   | 73 | 1.3011 | 2.4795 | 6.7013 | C | 0.018   |
| 32 | 2.4665 | 7.1189 | 0.0099 | C | 0.0324  | 74 | 1.2656 | 6.4324 | 6.6994 | C | -0.0065 |
| 33 | 4.9327 | 0.0007 | 3.3502 | C | -0.0237 | 75 | 0.0895 | 7.2744 | 6.6984 | C | -0.0375 |
| 34 | 9.8654 | 0.0014 | 3.3523 | C | -0.0184 | 76 | 4.8224 | 2.6502 | 6.7003 | C | 1.0922  |
| 35 | 4.9329 | 4.2731 | 3.3494 | C | -0.0338 | 77 | 5.0683 | 6.7873 | 6.7041 | C | -0.0068 |
| 36 | 9.8657 | 4.2733 | 3.3517 | C | -0.0193 | 78 | 9.8144 | 2.9835 | 6.6996 | C | 0.0335  |
| 37 | 4.9325 | 1.4251 | 3.3495 | C | 0.0586  | 79 | 7.458  | 0.0375 | 6.7    | C | 0.0317  |
| 38 | 9.8656 | 5.6974 | 3.3515 | C | 0.0615  | 80 | 2.1633 | 3.9953 | 6.702  | C | 0.0252  |
| 39 | 4.9331 | 5.6972 | 3.3483 | C | 0.0533  | 81 | 7.25   | 4.6578 | 6.7009 | C | -0.2149 |
| 40 | 9.8656 | 1.4257 | 3.3514 | C | 0.0616  | 82 | 2.5448 | 8.5229 | 6.7002 | C | 0.0278  |
| 41 | 6.1665 | 6.409  | 3.3486 | C | -0.0472 | 83 | 3.8356 | 0.5399 | 6.6985 | C | 0.5548  |
| 42 | 1.2332 | 2.1376 | 3.3503 | C | -0.042  | 84 | 8.5865 | 5.1504 | 6.6972 | C | 0.0147  |
| 43 | 1.233  | 6.4094 | 3.3505 | C | -0.0459 | 85 | 3.4596 | 4.6556 | 6.7037 | C | 0.4346  |
| 44 | 6.1661 | 2.1372 | 3.3496 | C | -0.0516 | 86 | 8.6557 | 0.8499 | 6.7002 | C | -0.01   |
| 45 | 1.233  | 7.8332 | 3.3513 | C | 0.0352  | 87 | 8.7384 | 6.5665 | 6.6965 | C | 0.0169  |
| 46 | 6.1662 | 3.5613 | 3.3494 | C | 0.0283  | 88 | 3.7043 | 6.1619 | 6.7029 | C | -0.0236 |
| 47 | 6.1662 | 7.8328 | 3.3493 | C | 0.0357  | 89 | 8.5623 | 2.3088 | 6.7005 | C | -0.0118 |
| 48 | 1.233  | 3.5613 | 3.3493 | C | 0.0374  | 90 | 7.2697 | 3.0902 | 6.703  | C | 0.0076  |
| 49 | 7.3993 | 0.0013 | 3.3509 | C | -0.0505 | 91 | 2.5335 | 7.0551 | 6.702  | C | -0.0191 |
| 50 | 2.4662 | 0.0012 | 3.3513 | C | -0.0486 | 92 | 7.472  | 7.1512 | 6.699  | C | -0.0331 |
| 51 | 7.3996 | 4.2735 | 3.3506 | C | -0.0496 | 93 | 5.5405 | 4.5697 | 6.6919 | H | 0.6486  |
| 52 | 2.466  | 4.2732 | 3.3491 | C | -0.0503 | 94 | 3.7878 | 1.8893 | 6.6944 | N | -1.286  |
| 53 | 7.3996 | 5.6971 | 3.3491 | C | 0.0335  | 95 | 4.6646 | 4.0095 | 6.7019 | O | -1.2064 |

## 2-PYRIDONE-NT

| COORDINATES (ANGSTROM) |        |        |        |        |         |
|------------------------|--------|--------|--------|--------|---------|
| ATOM                   | X      | Y      | Z      | SYMBOL | Q       |
| 1                      | 4.9329 | 8.5427 | 0.0107 | C      | -0.0216 |
| 2                      | 0.0001 | 4.2707 | 0.0107 | C      | -0.0214 |
| 3                      | 0.0001 | 8.5427 | 0.0107 | C      | -0.0214 |
| 4                      | 4.9329 | 4.2707 | 0.0106 | C      | -0.0217 |
| 5                      | 6.1662 | 0.7107 | 0.0099 | C      | 0.036   |
| 6                      | 1.2333 | 4.9827 | 0.0099 | C      | 0.0362  |
| 7                      | 6.1662 | 4.9827 | 0.0098 | C      | 0.0363  |
| 8                      | 1.2333 | 0.7107 | 0.0098 | C      | 0.0361  |
| 9                      | 1.2334 | 6.4067 | 0.0103 | C      | -0.0472 |
| 10                     | 6.1663 | 2.1347 | 0.0103 | C      | -0.0471 |
| 11                     | 1.2334 | 2.1347 | 0.0102 | C      | -0.0471 |
| 12                     | 6.1663 | 6.4067 | 0.0101 | C      | -0.047  |
| 13                     | 0.0001 | 2.8467 | 0.0102 | C      | 0.0624  |
| 14                     | 0.0001 | 7.1187 | 0.0102 | C      | 0.0624  |
| 15                     | 4.933  | 2.8467 | 0.0101 | C      | 0.062   |
| 16                     | 4.9329 | 7.1187 | 0.0101 | C      | 0.0622  |
| 17                     | 7.3994 | 4.2708 | 0.0106 | C      | -0.0509 |
| 18                     | 2.4665 | 8.5428 | 0.0107 | C      | -0.051  |
| 19                     | 2.4665 | 4.2707 | 0.0106 | C      | -0.0511 |
| 20                     | 7.3994 | 8.5427 | 0.0107 | C      | -0.0508 |
| 21                     | 8.6326 | 0.7107 | 0.0099 | C      | 0.036   |
| 22                     | 3.6997 | 0.7107 | 0.0099 | C      | 0.0359  |
| 23                     | 8.6326 | 4.9827 | 0.0099 | C      | 0.0362  |
| 24                     | 3.6997 | 4.9827 | 0.0097 | C      | 0.036   |
| 25                     | 3.6996 | 2.1347 | 0.0102 | C      | -0.0476 |
| 26                     | 3.6996 | 6.4067 | 0.0102 | C      | -0.0474 |
| 27                     | 8.6325 | 2.1347 | 0.0103 | C      | -0.0471 |
| 28                     | 8.6325 | 6.4067 | 0.0103 | C      | -0.047  |
| 29                     | 7.3994 | 2.8469 | 0.0099 | C      | 0.0321  |
| 30                     | 2.4665 | 2.8469 | 0.0098 | C      | 0.0321  |
| 31                     | 7.3994 | 7.1188 | 0.0099 | C      | 0.0321  |
| 32                     | 2.4665 | 7.1189 | 0.0099 | C      | 0.0323  |
| 33                     | 4.9327 | 0.0007 | 3.3502 | C      | -0.0255 |
| 34                     | 9.8654 | 0.0014 | 3.3523 | C      | -0.0195 |
| 35                     | 4.9329 | 4.2731 | 3.3494 | C      | -0.0213 |
| 36                     | 9.8657 | 4.2733 | 3.3517 | C      | -0.0193 |
| 37                     | 4.9325 | 1.4251 | 3.3495 | C      | 0.0543  |
| 38                     | 9.8656 | 5.6974 | 3.3515 | C      | 0.0619  |
| 39                     | 4.9331 | 5.6972 | 3.3483 | C      | 0.0623  |
| 40                     | 9.8656 | 1.4257 | 3.3514 | C      | 0.061   |
| 41                     | 6.1665 | 6.409  | 3.3486 | C      | -0.0445 |
| 42                     | 1.2332 | 2.1376 | 3.3503 | C      | -0.0461 |
| 43                     | 1.233  | 6.4094 | 3.3505 | C      | -0.0467 |
| 44                     | 6.1661 | 2.1372 | 3.3496 | C      | -0.049  |
| 45                     | 1.233  | 7.8332 | 3.3513 | C      | 0.0345  |
| 46                     | 6.1662 | 3.5613 | 3.3494 | C      | 0.0347  |
| 47                     | 6.1662 | 7.8328 | 3.3493 | C      | 0.0368  |
| 48                     | 1.233  | 3.5613 | 3.3493 | C      | 0.0349  |
| 49                     | 7.3993 | 0.0013 | 3.3509 | C      | -0.0503 |
| 50                     | 2.4662 | 0.0012 | 3.3513 | C      | -0.0516 |
| 51                     | 7.3996 | 4.2735 | 3.3506 | C      | -0.0468 |
| 52                     | 2.466  | 4.2732 | 3.3491 | C      | -0.0518 |
| 53                     | 7.3996 | 5.6971 | 3.3491 | C      | 0.0362  |
| 54                     | 2.4662 | 5.6969 | 3.3485 | C      | 0.032   |
| 55                     | 7.3994 | 1.425  | 3.3505 | C      | 0.0312  |
| 56                     | 2.4661 | 1.4251 | 3.3501 | C      | 0.0273  |
| 57                     | 8.6323 | 6.4093 | 3.3513 | C      | -0.0443 |
| 58                     | 3.699  | 2.1369 | 3.3493 | C      | -0.0562 |
| 59                     | 8.6324 | 2.1375 | 3.3508 | C      | -0.0444 |
| 60                     | 3.6995 | 6.4088 | 3.3481 | C      | -0.049  |
| 61                     | 8.6325 | 7.8333 | 3.3514 | C      | 0.036   |
| 62                     | 8.6325 | 3.5615 | 3.351  | C      | 0.0362  |
| 63                     | 3.6994 | 3.561  | 3.3491 | C      | 0.0266  |
| 64                     | 3.6994 | 7.8328 | 3.3493 | C      | 0.0355  |
| 65                     | 0.0961 | 0.2075 | 6.6999 | C      | 0.0246  |
| 66                     | 5.0546 | 8.3262 | 6.7009 | C      | 0.0467  |
| 67                     | 9.7441 | 4.3926 | 6.6965 | C      | -0.0186 |
| 68                     | 1.3779 | 0.9395 | 6.7025 | C      | -0.0304 |
| 69                     | 6.2067 | 0.682  | 6.7016 | C      | 0.0408  |
| 70                     | 1.1404 | 5.0056 | 6.6991 | C      | 0.0202  |
| 71                     | 6.1482 | 2.1633 | 6.702  | C      | 0.0033  |
| 72                     | 6.4055 | 6.147  | 6.7014 | C      | 0.0017  |
| 73                     | 1.3011 | 2.4795 | 6.7013 | C      | -0.1274 |
| 74                     | 1.2656 | 6.4324 | 6.6994 | C      | -0.0065 |
| 75                     | 0.0895 | 7.2744 | 6.6984 | C      | -0.0421 |
| 76                     | 4.8224 | 2.6502 | 6.7003 | C      | 1.1656  |
| 77                     | 5.0683 | 6.7873 | 6.7041 | C      | -0.0141 |

|    |        |        |        |   |         |    |        |        |        |   |         |
|----|--------|--------|--------|---|---------|----|--------|--------|--------|---|---------|
| 78 | 9.8144 | 2.9835 | 6.6996 | C | 0.048   | 18 | 7.3993 | 4.2709 | 0.0139 | C | -0.052  |
| 79 | 7.458  | 0.0375 | 6.7    | C | -0.0412 | 19 | 2.4664 | 8.5429 | 0.0139 | C | -0.052  |
| 80 | 2.1633 | 3.9953 | 6.702  | C | -0.0737 | 20 | 2.4664 | 4.2709 | 0.0137 | C | -0.0522 |
| 81 | 7.25   | 4.6578 | 6.7009 | C | -0.017  | 21 | 8.6325 | 0.7108 | 0.0129 | C | 0.0343  |
| 82 | 2.5448 | 8.5229 | 6.7002 | C | 0.0048  | 22 | 8.6325 | 4.9828 | 0.013  | C | 0.0341  |
| 83 | 3.8356 | 0.5399 | 6.6985 | C | 0.4319  | 23 | 3.6996 | 0.7109 | 0.0132 | C | 0.0342  |
| 84 | 8.5865 | 5.1504 | 6.6972 | C | 0.0051  | 24 | 3.6996 | 4.9828 | 0.0131 | C | 0.0342  |
| 85 | 3.4596 | 4.6556 | 6.7037 | C | 0.5305  | 25 | 3.6995 | 2.1349 | 0.013  | C | -0.0491 |
| 86 | 8.6557 | 0.8499 | 6.7002 | C | 0.0131  | 26 | 3.6995 | 6.4069 | 0.013  | C | -0.049  |
| 87 | 8.7384 | 6.5665 | 6.6965 | C | 0.0109  | 27 | 8.6324 | 2.135  | 0.0127 | C | -0.0491 |
| 88 | 3.7043 | 6.1619 | 6.7029 | C | -0.0049 | 28 | 8.6324 | 6.407  | 0.0128 | C | -0.049  |
| 89 | 8.5623 | 2.3088 | 6.7005 | C | -0.012  | 29 | 7.3994 | 7.1191 | 0.0126 | C | 0.0313  |
| 90 | 7.2697 | 3.0902 | 6.703  | C | 0.0155  | 30 | 7.3993 | 2.847  | 0.0126 | C | 0.0311  |
| 91 | 2.5335 | 7.0551 | 6.702  | C | 0.0416  | 31 | 2.4664 | 7.119  | 0.0126 | C | 0.0311  |
| 92 | 7.472  | 7.1512 | 6.699  | C | 0.0054  | 32 | 2.4664 | 2.8471 | 0.0126 | C | 0.0313  |
| 93 | 2.8804 | 2.3432 | 6.6909 | H | 0.4951  | 33 | 4.933  | 0.0009 | 3.353  | C | -0.0274 |
| 94 | 3.7878 | 1.8893 | 6.6944 | N | -1.3864 | 34 | 4.9328 | 4.2729 | 3.353  | C | -0.0274 |
| 95 | 4.6646 | 4.0095 | 6.7019 | O | -1.1049 | 35 | 9.8657 | 0.0008 | 3.352  | C | -0.0235 |

QUATERNARY NITROGEN-Q2

COORDINATES (ANGSTROM)

| ATOM | X      | Y      | Z      | SYMBOL | Q       |    |        |        |        |   |         |
|------|--------|--------|--------|--------|---------|----|--------|--------|--------|---|---------|
| 1    | 9.8657 | 8.543  | 0.014  | C      | -0.0229 | 41 | 6.1666 | 2.1367 | 3.352  | C | -0.0506 |
| 2    | 0      | 4.271  | 0.014  | C      | -0.0229 | 42 | 6.1662 | 6.409  | 3.3527 | C | -0.0526 |
| 3    | 4.9329 | 8.5429 | 0.0143 | C      | -0.0231 | 43 | 1.2332 | 2.1369 | 3.3519 | C | -0.0496 |
| 4    | 4.9329 | 4.2709 | 0.0143 | C      | -0.0231 | 44 | 1.2332 | 6.4086 | 3.3514 | C | -0.0496 |
| 5    | 1.2333 | 0.7108 | 0.013  | C      | 0.0341  | 45 | 6.1664 | 3.5607 | 3.3533 | C | 0.0314  |
| 6    | 1.2332 | 4.9828 | 0.0129 | C      | 0.0343  | 46 | 6.1664 | 7.8331 | 3.3527 | C | 0.0326  |
| 7    | 6.1662 | 0.7108 | 0.0131 | C      | 0.0342  | 47 | 1.2331 | 3.5608 | 3.3519 | C | 0.034   |
| 8    | 6.1662 | 4.9829 | 0.0132 | C      | 0.0342  | 48 | 1.2328 | 7.8326 | 3.3522 | C | 0.0352  |
| 9    | 1.2334 | 2.135  | 0.0128 | C      | -0.049  | 49 | 2.4661 | 0.0007 | 3.3531 | C | -0.0568 |
| 10   | 1.2333 | 6.407  | 0.0127 | C      | -0.0491 | 50 | 2.4663 | 4.2728 | 3.3519 | C | -0.0534 |
| 11   | 6.1662 | 2.1349 | 0.013  | C      | -0.049  | 51 | 7.3994 | 0.0008 | 3.3519 | C | -0.0534 |
| 12   | 6.1663 | 6.4069 | 0.013  | C      | -0.0491 | 52 | 7.3996 | 4.2727 | 3.3531 | C | -0.0568 |
| 13   | 9.8657 | 2.8468 | 0.013  | C      | 0.061   | 53 | 7.3996 | 5.6969 | 3.3531 | C | 0.0274  |
| 14   | 0      | 7.1188 | 0.013  | C      | 0.061   | 54 | 2.4661 | 1.4249 | 3.3531 | C | 0.0274  |
| 15   | 4.9329 | 2.8468 | 0.0134 | C      | 0.0606  | 55 | 2.4662 | 5.6966 | 3.3517 | C | 0.0307  |
| 16   | 4.9329 | 7.1188 | 0.0134 | C      | 0.0606  | 56 | 7.3996 | 1.4246 | 3.3517 | C | 0.0307  |
| 17   | 7.3993 | 8.5429 | 0.0137 | C      | -0.0522 | 57 | 8.6325 | 2.1366 | 3.3514 | C | -0.0496 |
|      |        |        |        |        |         | 58 | 3.6992 | 6.4087 | 3.352  | C | -0.0506 |
|      |        |        |        |        |         | 59 | 3.6995 | 2.137  | 3.3527 | C | -0.0527 |

|    |        |        |        |   |         |    |        |        |        |   |         |
|----|--------|--------|--------|---|---------|----|--------|--------|--------|---|---------|
| 60 | 8.6326 | 6.4089 | 3.3519 | C | -0.0496 | 1  | 9.8658 | 4.272  | 0.0003 | C | -0.0271 |
| 61 | 3.6994 | 3.5611 | 3.3527 | C | 0.0326  | 2  | 4.9329 | 0      | 0.0003 | C | -0.0271 |
| 62 | 3.6994 | 7.8327 | 3.3533 | C | 0.0314  | 3  | 0      | 0      | 0.0003 | C | -0.0271 |
| 63 | 8.6326 | 7.8328 | 3.3519 | C | 0.034   | 4  | 4.9329 | 4.272  | 0.0003 | C | -0.0271 |
| 64 | 8.6329 | 3.5606 | 3.3522 | C | 0.0352  | 5  | 6.1661 | 0.7119 | 0.0002 | C | 0.0369  |
| 65 | 0.003  | 0.0009 | 6.6973 | C | -0.0159 | 6  | 1.2332 | 0.7119 | 0.0002 | C | 0.0369  |
| 66 | 4.9367 | 4.271  | 6.6922 | C | 0.3255  | 7  | 1.2332 | 4.9839 | 0.0002 | C | 0.0369  |
| 67 | 4.929  | 8.543  | 6.6922 | C | 0.3255  | 8  | 6.1661 | 4.9839 | 0.0002 | C | 0.0369  |
| 68 | 9.8627 | 4.2729 | 6.6973 | C | -0.0159 | 9  | 1.2332 | 2.136  | 0.0003 | C | -0.052  |
| 69 | 6.1552 | 0.7176 | 6.6962 | C | -0.0105 | 10 | 1.2332 | 6.408  | 0.0003 | C | -0.052  |
| 70 | 1.2444 | 0.7142 | 6.6962 | C | -0.0212 | 11 | 6.1661 | 2.136  | 0.0003 | C | -0.052  |
| 71 | 1.2372 | 4.9843 | 6.6996 | C | -0.035  | 12 | 6.1661 | 6.408  | 0.0003 | C | -0.052  |
| 72 | 6.1631 | 6.4031 | 6.6918 | C | 0.3401  | 13 | 9.8658 | 2.8479 | 0.0002 | C | 0.0625  |
| 73 | 1.2303 | 2.1373 | 6.6958 | C | 0.038   | 14 | 0      | 7.1199 | 0.0002 | C | 0.0625  |
| 74 | 6.1695 | 2.1338 | 6.695  | C | 0.0533  | 15 | 4.9329 | 2.8479 | 0.0002 | C | 0.0625  |
| 75 | 1.2366 | 6.4117 | 6.6987 | C | 0.0183  | 16 | 4.9329 | 7.1199 | 0.0002 | C | 0.0625  |
| 76 | 4.9298 | 7.1212 | 6.6935 | C | 0.0541  | 17 | 7.3993 | 4.272  | 0.0003 | C | -0.0544 |
| 77 | 4.936  | 2.8492 | 6.6935 | C | 0.0541  | 18 | 2.4664 | 0      | 0.0003 | C | -0.0544 |
| 78 | 9.8645 | 7.1188 | 6.6984 | C | 0.0692  | 19 | 2.4664 | 4.272  | 0.0003 | C | -0.0544 |
| 79 | 0.0013 | 2.8468 | 6.6984 | C | 0.0692  | 20 | 7.3993 | 0      | 0.0003 | C | -0.0544 |
| 80 | 2.4762 | 4.2651 | 6.6981 | C | -0.0264 | 21 | 3.6997 | 4.9839 | 0.0002 | C | 0.0369  |
| 81 | 7.3897 | 4.2798 | 6.6939 | C | 0.3298  | 22 | 8.6325 | 0.7119 | 0.0002 | C | 0.0369  |
| 82 | 7.3896 | 8.5371 | 6.6981 | C | -0.0264 | 23 | 8.6325 | 4.9839 | 0.0002 | C | 0.0369  |
| 83 | 2.4761 | 0.0078 | 6.6939 | C | 0.3297  | 24 | 3.6997 | 0.7119 | 0.0002 | C | 0.0369  |
| 84 | 3.7105 | 4.9896 | 6.6962 | C | -0.0105 | 25 | 3.6997 | 2.136  | 0.0003 | C | -0.052  |
| 85 | 8.6214 | 4.9862 | 6.6962 | C | -0.0212 | 26 | 3.6997 | 6.408  | 0.0003 | C | -0.052  |
| 86 | 8.6286 | 0.7123 | 6.6996 | C | -0.035  | 27 | 8.6325 | 2.136  | 0.0003 | C | -0.052  |
| 87 | 3.7027 | 2.1311 | 6.6918 | C | 0.34    | 28 | 8.6325 | 6.408  | 0.0003 | C | -0.052  |
| 88 | 3.6962 | 6.4058 | 6.695  | C | 0.0533  | 29 | 2.4664 | 7.1199 | 0.0002 | C | 0.034   |
| 89 | 8.6355 | 6.4093 | 6.6958 | C | 0.038   | 30 | 7.3993 | 7.1199 | 0.0002 | C | 0.034   |
| 90 | 8.6292 | 2.1397 | 6.6987 | C | 0.0183  | 31 | 2.4664 | 2.8479 | 0.0002 | C | 0.034   |
| 91 | 2.4721 | 2.8384 | 6.6956 | C | 0.0591  | 32 | 7.3993 | 2.8479 | 0.0002 | C | 0.034   |
| 92 | 2.4764 | 7.1278 | 6.6973 | C | 0.0574  | 33 | 9.8657 | 4.2719 | 3.3501 | C | -0.0278 |
| 93 | 7.3936 | 7.1104 | 6.6956 | C | 0.0591  | 34 | 4.933  | 8.5439 | 3.3501 | C | -0.0278 |
| 94 | 7.3893 | 2.8558 | 6.6973 | C | 0.0574  | 35 | 4.9328 | 4.2719 | 3.3501 | C | -0.0278 |
| 95 | 6.1628 | 4.986  | 6.6923 | N | -1.1536 | 36 | 0.0001 | 8.5439 | 3.3501 | C | -0.0278 |
| 96 | 3.7029 | 0.714  | 6.6923 | N | -1.1536 | 37 | 4.933  | 1.4242 | 3.3502 | C | 0.0596  |
|    |        |        |        |   |         | 38 | 0.0001 | 1.4242 | 3.3502 | C | 0.0596  |
|    |        |        |        |   |         | 39 | 9.8657 | 5.6962 | 3.3502 | C | 0.0596  |
|    |        |        |        |   |         | 40 | 4.9328 | 5.6962 | 3.3502 | C | 0.0596  |
|    |        |        |        |   |         | 41 | 6.1661 | 6.408  | 3.3499 | C | -0.0536 |
|    |        |        |        |   |         | 42 | 1.2332 | 2.1359 | 3.3498 | C | -0.0518 |

QUATERNARY NITROGEN-Q4

COORDINATES (ANGSTROM)

ATOM X Y Z SYMBOL Q

|    |        |        |        |   |         |
|----|--------|--------|--------|---|---------|
| 43 | 1.2332 | 6.408  | 3.3499 | C | -0.0536 |
| 44 | 6.1661 | 2.1359 | 3.3498 | C | -0.0518 |
| 45 | 1.2332 | 7.8321 | 3.3501 | C | 0.0363  |
| 46 | 6.1661 | 3.5599 | 3.3501 | C | 0.0349  |
| 47 | 6.1661 | 7.8321 | 3.3501 | C | 0.0363  |
| 48 | 1.2332 | 3.5599 | 3.3501 | C | 0.0349  |
| 49 | 2.4664 | 8.5439 | 3.3501 | C | -0.0595 |
| 50 | 2.4665 | 4.2719 | 3.3501 | C | -0.0594 |
| 51 | 7.3992 | 8.5439 | 3.3501 | C | -0.0595 |
| 52 | 7.3994 | 4.2719 | 3.3501 | C | -0.0594 |
| 53 | 7.3994 | 5.6962 | 3.3502 | C | 0.0288  |
| 54 | 2.4665 | 5.6962 | 3.3502 | C | 0.0288  |
| 55 | 7.3992 | 1.4242 | 3.3502 | C | 0.0289  |
| 56 | 2.4663 | 1.4242 | 3.3502 | C | 0.0289  |
| 57 | 8.6325 | 6.4079 | 3.3498 | C | -0.0518 |
| 58 | 8.6325 | 2.136  | 3.3499 | C | -0.0536 |
| 59 | 3.6997 | 6.4079 | 3.3498 | C | -0.0518 |
| 60 | 3.6997 | 2.136  | 3.3499 | C | -0.0536 |
| 61 | 3.6997 | 7.8319 | 3.3501 | C | 0.0349  |
| 62 | 3.6997 | 3.5601 | 3.3501 | C | 0.0363  |
| 63 | 8.6325 | 7.8319 | 3.3501 | C | 0.0349  |
| 64 | 8.6325 | 3.5601 | 3.3501 | C | 0.0363  |
| 65 | 0.0004 | 8.5437 | 6.7102 | C | 0.3282  |
| 66 | 4.9324 | 4.2717 | 6.7102 | C | 0.3282  |
| 67 | 4.9333 | 8.5437 | 6.7102 | C | 0.3282  |
| 68 | 9.8653 | 4.2717 | 6.7102 | C | 0.3282  |
| 69 | 6.1661 | 0.7169 | 6.7119 | C | 0.0169  |
| 70 | 1.2332 | 0.7169 | 6.7119 | C | 0.0169  |
| 71 | 1.2332 | 6.4091 | 6.7102 | C | 0.3347  |
| 72 | 6.1661 | 6.4091 | 6.7102 | C | 0.3347  |
| 73 | 1.2332 | 2.1362 | 6.7103 | C | 0.0721  |
| 74 | 6.1661 | 2.1362 | 6.7103 | C | 0.0721  |
| 75 | 0.0041 | 2.846  | 6.7119 | C | 0.0518  |
| 76 | 4.9287 | 7.118  | 6.7119 | C | 0.0518  |
| 77 | 4.937  | 2.846  | 6.7119 | C | 0.0518  |
| 78 | 9.8616 | 7.118  | 6.7119 | C | 0.0518  |
| 79 | 7.3989 | 8.5437 | 6.7102 | C | 0.3403  |
| 80 | 2.4669 | 4.2717 | 6.7102 | C | 0.3403  |
| 81 | 7.3998 | 4.2717 | 6.7102 | C | 0.3403  |
| 82 | 2.466  | 8.5437 | 6.7102 | C | 0.3403  |
| 83 | 3.6997 | 4.9889 | 6.7119 | C | 0.0168  |
| 84 | 8.6325 | 4.9889 | 6.7119 | C | 0.0168  |

|    |        |        |        |   |         |
|----|--------|--------|--------|---|---------|
| 85 | 3.6997 | 6.4082 | 6.7103 | C | 0.0721  |
| 86 | 8.6325 | 2.1371 | 6.7102 | C | 0.3347  |
| 87 | 3.6997 | 2.1371 | 6.7102 | C | 0.3347  |
| 88 | 8.6325 | 6.4082 | 6.7103 | C | 0.0721  |
| 89 | 7.3952 | 2.846  | 6.7119 | C | 0.0281  |
| 90 | 2.4706 | 7.118  | 6.7119 | C | 0.0281  |
| 91 | 7.4035 | 7.118  | 6.7119 | C | 0.0281  |
| 92 | 2.4623 | 2.846  | 6.7119 | C | 0.0281  |
| 93 | 1.2332 | 4.9838 | 6.7117 | N | -1.1237 |
| 94 | 6.1661 | 4.9838 | 6.7117 | N | -1.1237 |
| 95 | 3.6997 | 0.7118 | 6.7117 | N | -1.1237 |
| 96 | 8.6325 | 0.7118 | 6.7117 | N | -1.1237 |

---

QUATERNARY NITROGEN-Q6

---

COORDINATES (ANGSTROM)

| ATOM | X      | Y      | Z      | SYMBOL | Q       |
|------|--------|--------|--------|--------|---------|
| 1    | 4.9328 | 8.5434 | 0.0078 | C      | -0.0246 |
| 2    | 9.8657 | 8.5434 | 0.0078 | C      | -0.0246 |
| 3    | 9.8657 | 4.2714 | 0.0078 | C      | -0.0246 |
| 4    | 4.9328 | 4.2714 | 0.0078 | C      | -0.0246 |
| 5    | 1.2332 | 4.9832 | 0.0076 | C      | 0.0354  |
| 6    | 6.1661 | 0.7112 | 0.0076 | C      | 0.0352  |
| 7    | 1.2332 | 0.7112 | 0.0076 | C      | 0.0352  |
| 8    | 6.1661 | 4.9832 | 0.0076 | C      | 0.0354  |
| 9    | 1.2333 | 2.1354 | 0.0083 | C      | -0.0498 |
| 10   | 1.2333 | 6.4075 | 0.0082 | C      | -0.0497 |
| 11   | 6.1661 | 2.1354 | 0.0083 | C      | -0.0498 |
| 12   | 6.1662 | 6.4075 | 0.0082 | C      | -0.0497 |
| 13   | 9.8656 | 2.8472 | 0.0078 | C      | 0.0605  |
| 14   | 9.8657 | 7.1192 | 0.0077 | C      | 0.0603  |
| 15   | 4.9328 | 2.8472 | 0.0078 | C      | 0.0605  |
| 16   | 4.9328 | 7.1192 | 0.0077 | C      | 0.0603  |
| 17   | 2.4663 | 8.5434 | 0.0085 | C      | -0.0531 |
| 18   | 2.4663 | 4.2714 | 0.0086 | C      | -0.0533 |
| 19   | 7.3992 | 8.5434 | 0.0085 | C      | -0.0531 |
| 20   | 7.3992 | 4.2714 | 0.0086 | C      | -0.0533 |
| 21   | 3.6995 | 0.7112 | 0.0075 | C      | 0.0355  |
| 22   | 3.6996 | 4.9832 | 0.0075 | C      | 0.0355  |
| 23   | 8.6324 | 0.7112 | 0.0075 | C      | 0.0355  |

|    |        |        |        |   |         |    |        |        |        |   |         |
|----|--------|--------|--------|---|---------|----|--------|--------|--------|---|---------|
| 24 | 8.6324 | 4.9832 | 0.0075 | C | 0.0355  | 66 | 0.0009 | 0.0071 | 6.7019 | C | 0.3322  |
| 25 | 3.6994 | 2.1354 | 0.0083 | C | -0.0493 | 67 | 4.9338 | 0.0071 | 6.7019 | C | 0.3322  |
| 26 | 3.6994 | 6.4075 | 0.0082 | C | -0.0491 | 68 | 0.0017 | 4.2759 | 6.704  | C | 0.299   |
| 27 | 8.6323 | 2.1354 | 0.0083 | C | -0.0493 | 69 | 1.2385 | 0.7236 | 6.7046 | C | 0.07    |
| 28 | 8.6323 | 6.4075 | 0.0082 | C | -0.0491 | 70 | 6.1714 | 0.7236 | 6.7046 | C | 0.07    |
| 29 | 2.4663 | 2.8474 | 0.0082 | C | 0.0315  | 71 | 1.2358 | 6.4054 | 6.7024 | C | 0.3181  |
| 30 | 2.4663 | 7.1193 | 0.008  | C | 0.0315  | 72 | 6.1687 | 6.4054 | 6.7024 | C | 0.3181  |
| 31 | 7.3992 | 2.8474 | 0.0082 | C | 0.0315  | 73 | 1.2352 | 2.1386 | 6.7044 | C | 0.2932  |
| 32 | 7.3992 | 7.1193 | 0.008  | C | 0.0315  | 74 | 6.1681 | 2.1386 | 6.7044 | C | 0.2932  |
| 33 | 9.8654 | 0.0003 | 3.351  | C | -0.0266 | 75 | 0.0048 | 2.8491 | 6.7052 | C | 0.099   |
| 34 | 9.8653 | 4.2726 | 3.3512 | C | -0.025  | 76 | 4.9277 | 7.1179 | 6.7048 | C | 0.0629  |
| 35 | 4.9326 | 0.0003 | 3.351  | C | -0.0266 | 77 | 4.9377 | 2.8491 | 6.7052 | C | 0.099   |
| 36 | 4.9325 | 4.2726 | 3.3512 | C | -0.025  | 78 | 9.8606 | 7.1179 | 6.7048 | C | 0.0629  |
| 37 | 9.8653 | 5.6969 | 3.3498 | C | 0.0583  | 79 | 2.4705 | 4.2674 | 6.7012 | C | 0.752   |
| 38 | 4.9328 | 1.4243 | 3.3514 | C | 0.0599  | 80 | 7.4034 | 4.2674 | 6.7012 | C | 0.752   |
| 39 | 9.8657 | 1.4243 | 3.3514 | C | 0.0599  | 81 | 2.4604 | 8.5404 | 6.7034 | C | 0.3279  |
| 40 | 4.9324 | 5.6969 | 3.3498 | C | 0.0583  | 82 | 7.3933 | 8.5404 | 6.7034 | C | 0.3279  |
| 41 | 1.233  | 2.1363 | 3.3503 | C | -0.0531 | 83 | 3.7003 | 4.9795 | 6.7056 | C | 0.044   |
| 42 | 1.2331 | 6.4085 | 3.3495 | C | -0.0517 | 84 | 8.6332 | 4.9795 | 6.7056 | C | 0.044   |
| 43 | 6.1659 | 2.1363 | 3.3503 | C | -0.0531 | 85 | 8.6274 | 6.4041 | 6.7054 | C | 0.0567  |
| 44 | 6.166  | 6.4085 | 3.3495 | C | -0.0517 | 86 | 3.6945 | 6.4041 | 6.7054 | C | 0.0567  |
| 45 | 1.2328 | 3.5605 | 3.3522 | C | 0.0304  | 87 | 8.6344 | 2.1429 | 6.6982 | C | 0.7641  |
| 46 | 1.2329 | 7.8325 | 3.3503 | C | 0.0364  | 88 | 3.7016 | 2.1429 | 6.6982 | C | 0.7641  |
| 47 | 6.1657 | 3.5605 | 3.3522 | C | 0.0304  | 89 | 2.4694 | 7.1185 | 6.7047 | C | 0.0469  |
| 48 | 6.1658 | 7.8325 | 3.3503 | C | 0.0364  | 90 | 7.4023 | 7.1185 | 6.7047 | C | 0.0469  |
| 49 | 2.466  | 8.544  | 3.3511 | C | -0.0578 | 91 | 1.2402 | 4.9689 | 6.7001 | N | -1.1308 |
| 50 | 2.4662 | 4.2724 | 3.3523 | C | -0.0568 | 92 | 6.1731 | 4.9689 | 6.7001 | N | -1.1308 |
| 51 | 7.3989 | 8.544  | 3.3511 | C | -0.0578 | 93 | 8.6235 | 0.725  | 6.697  | N | -1.1142 |
| 52 | 7.399  | 4.2724 | 3.3523 | C | -0.0568 | 94 | 3.6906 | 0.725  | 6.697  | N | -1.1142 |
| 53 | 7.3988 | 1.4242 | 3.3517 | C | 0.0278  | 95 | 7.3981 | 2.8453 | 6.6971 | N | -1.1255 |
| 54 | 2.466  | 1.4242 | 3.3517 | C | 0.0278  | 96 | 2.4652 | 2.8453 | 6.6971 | N | -1.1255 |
| 55 | 7.3991 | 5.6969 | 3.3502 | C | 0.0284  |    |        |        |        |   |         |
| 56 | 2.4663 | 5.6969 | 3.3502 | C | 0.0284  |    |        |        |        |   |         |
| 57 | 3.6992 | 2.1364 | 3.3515 | C | -0.0546 |    |        |        |        |   |         |
| 58 | 8.6319 | 6.4083 | 3.3484 | C | -0.0494 |    |        |        |        |   |         |
| 59 | 8.6321 | 2.1364 | 3.3515 | C | -0.0546 |    |        |        |        |   |         |
| 60 | 3.699  | 6.4083 | 3.3484 | C | -0.0494 |    |        |        |        |   |         |
| 61 | 8.6323 | 3.5606 | 3.352  | C | 0.0323  |    |        |        |        |   |         |
| 62 | 3.6992 | 7.8323 | 3.3503 | C | 0.0341  |    |        |        |        |   |         |
| 63 | 3.6994 | 3.5606 | 3.352  | C | 0.0323  |    |        |        |        |   |         |
| 64 | 8.6321 | 7.8323 | 3.3503 | C | 0.0341  |    |        |        |        |   |         |
| 65 | 4.9346 | 4.2759 | 6.704  | C | 0.299   |    |        |        |        |   |         |

QUATERNARY NITROGEN-Q8

COORDINATES (ANGSTROM)

| ATOM | X      | Y      | Z      | SYMBOL | Q      |
|------|--------|--------|--------|--------|--------|
| 1    | 0      | 0      | 0.0003 | C      | -0.027 |
| 2    | 9.8658 | 4.272  | 0.0003 | C      | -0.027 |
| 3    | 4.9329 | 0      | 0.0003 | C      | -0.027 |
| 4    | 4.9329 | 4.272  | 0.0003 | C      | -0.027 |
| 5    | 1.2332 | 0.7119 | 0.0002 | C      | 0.037  |
| 6    | 1.2332 | 4.9839 | 0.0002 | C      | 0.0369 |

|    |        |        |        |   |         |    |        |        |        |   |         |
|----|--------|--------|--------|---|---------|----|--------|--------|--------|---|---------|
| 7  | 6.1661 | 0.7119 | 0.0002 | C | 0.037   | 49 | 2.4663 | 8.5438 | 3.3499 | C | -0.0586 |
| 8  | 6.1661 | 4.9839 | 0.0002 | C | 0.0369  | 50 | 2.4665 | 4.272  | 3.35   | C | -0.0605 |
| 9  | 1.2332 | 2.136  | 0.0003 | C | -0.0521 | 51 | 7.3992 | 8.5438 | 3.3499 | C | -0.0586 |
| 10 | 1.2332 | 6.408  | 0.0003 | C | -0.0521 | 52 | 7.3994 | 4.272  | 3.35   | C | -0.0605 |
| 11 | 6.1661 | 2.136  | 0.0003 | C | -0.0521 | 53 | 7.3995 | 5.6962 | 3.35   | C | 0.0302  |
| 12 | 6.1661 | 6.408  | 0.0003 | C | -0.0521 | 54 | 2.4666 | 5.6962 | 3.35   | C | 0.0302  |
| 13 | 9.8658 | 2.8479 | 0.0002 | C | 0.0625  | 55 | 7.3992 | 1.424  | 3.3501 | C | 0.0287  |
| 14 | 0      | 7.1199 | 0.0002 | C | 0.0625  | 56 | 2.4663 | 1.424  | 3.3501 | C | 0.0287  |
| 15 | 4.9329 | 2.8479 | 0.0002 | C | 0.0625  | 57 | 3.6995 | 6.4078 | 3.3499 | C | -0.0526 |
| 16 | 4.9329 | 7.1199 | 0.0002 | C | 0.0625  | 58 | 3.6997 | 2.136  | 3.35   | C | -0.0553 |
| 17 | 2.4664 | 4.272  | 0.0003 | C | -0.0545 | 59 | 8.6324 | 6.4078 | 3.3499 | C | -0.0526 |
| 18 | 7.3993 | 0      | 0.0003 | C | -0.0545 | 60 | 8.6326 | 2.136  | 3.35   | C | -0.0553 |
| 19 | 7.3993 | 4.272  | 0.0003 | C | -0.0545 | 61 | 8.6324 | 7.832  | 3.3501 | C | 0.0336  |
| 20 | 2.4664 | 0      | 0.0003 | C | -0.0545 | 62 | 8.6327 | 3.5602 | 3.35   | C | 0.0351  |
| 21 | 8.6325 | 4.9839 | 0.0002 | C | 0.037   | 63 | 3.6995 | 7.832  | 3.3501 | C | 0.0336  |
| 22 | 3.6997 | 0.7119 | 0.0002 | C | 0.0369  | 64 | 3.6998 | 3.5602 | 3.35   | C | 0.0351  |
| 23 | 3.6997 | 4.9839 | 0.0002 | C | 0.037   | 65 | 0.0039 | 0.0024 | 6.71   | C | 0.7302  |
| 24 | 8.6325 | 0.7119 | 0.0002 | C | 0.0369  | 66 | 4.9298 | 4.2702 | 6.7104 | C | 0.3017  |
| 25 | 3.6997 | 2.136  | 0.0003 | C | -0.0521 | 67 | 4.9368 | 0.0024 | 6.71   | C | 0.7302  |
| 26 | 3.6997 | 6.408  | 0.0003 | C | -0.0521 | 68 | 9.8627 | 4.2702 | 6.7104 | C | 0.3017  |
| 27 | 8.6325 | 2.136  | 0.0003 | C | -0.0521 | 69 | 6.1694 | 0.7141 | 6.712  | C | 0.0993  |
| 28 | 8.6325 | 6.408  | 0.0003 | C | -0.0521 | 70 | 1.2365 | 0.7141 | 6.712  | C | 0.0993  |
| 29 | 7.3993 | 2.8479 | 0.0002 | C | 0.0339  | 71 | 1.2372 | 6.4104 | 6.71   | C | 0.7228  |
| 30 | 2.4664 | 2.8479 | 0.0002 | C | 0.0339  | 72 | 6.17   | 6.4104 | 6.71   | C | 0.7228  |
| 31 | 7.3993 | 7.1199 | 0.0002 | C | 0.0339  | 73 | 1.2301 | 2.1342 | 6.7104 | C | 0.3053  |
| 32 | 2.4664 | 7.1199 | 0.0002 | C | 0.0339  | 74 | 6.163  | 2.1342 | 6.7104 | C | 0.3053  |
| 33 | 4.9327 | 4.2718 | 3.3499 | C | -0.0272 | 75 | 0.0033 | 2.8501 | 6.712  | C | 0.1077  |
| 34 | 0.0001 | 8.544  | 3.35   | C | -0.0288 | 76 | 4.9362 | 2.8501 | 6.712  | C | 0.1077  |
| 35 | 9.8656 | 4.2718 | 3.3499 | C | -0.0272 | 77 | 2.4704 | 4.2744 | 6.71   | C | 0.7225  |
| 36 | 4.933  | 8.544  | 3.35   | C | -0.0288 | 78 | 7.4033 | 4.2744 | 6.71   | C | 0.7225  |
| 37 | 0.0001 | 1.4242 | 3.35   | C | 0.0611  | 79 | 2.4634 | 8.5422 | 6.7104 | C | 0.3059  |
| 38 | 9.8656 | 5.696  | 3.3501 | C | 0.0591  | 80 | 7.3962 | 8.5422 | 6.7104 | C | 0.3059  |
| 39 | 4.933  | 1.4242 | 3.35   | C | 0.0611  | 81 | 3.703  | 4.9861 | 6.712  | C | 0.1159  |
| 40 | 4.9327 | 5.696  | 3.3501 | C | 0.0591  | 82 | 8.6358 | 4.9861 | 6.712  | C | 0.1159  |
| 41 | 1.2333 | 6.408  | 3.35   | C | -0.0554 | 83 | 3.6966 | 6.4062 | 6.7104 | C | 0.3011  |
| 42 | 6.166  | 2.1358 | 3.3499 | C | -0.0531 | 84 | 3.7036 | 2.1384 | 6.71   | C | 0.7252  |
| 43 | 6.1662 | 6.408  | 3.35   | C | -0.0554 | 85 | 8.6295 | 6.4062 | 6.7104 | C | 0.3011  |
| 44 | 1.2331 | 2.1358 | 3.3499 | C | -0.0531 | 86 | 8.6365 | 2.1384 | 6.71   | C | 0.7252  |
| 45 | 6.1662 | 7.8322 | 3.35   | C | 0.0351  | 87 | 7.4026 | 7.1221 | 6.712  | C | 0.103   |
| 46 | 1.2331 | 3.56   | 3.3501 | C | 0.0339  | 88 | 2.4697 | 7.1221 | 6.712  | C | 0.103   |
| 47 | 1.2334 | 7.8322 | 3.35   | C | 0.0351  | 89 | 1.2291 | 4.9819 | 6.7117 | N | -1.1131 |
| 48 | 6.1659 | 3.56   | 3.3501 | C | 0.0339  | 90 | 6.162  | 4.9819 | 6.7117 | N | -1.1131 |

|    |        |        |        |   |         |    |        |        |        |   |         |
|----|--------|--------|--------|---|---------|----|--------|--------|--------|---|---------|
| 91 | 4.9288 | 7.1179 | 6.7117 | N | -1.1005 | 94 | 3.6956 | 0.7099 | 6.7117 | N | -1.109  |
| 92 | 9.8617 | 7.1179 | 6.7117 | N | -1.1005 | 95 | 7.3952 | 2.8459 | 6.7117 | N | -1.1121 |
| 93 | 8.6285 | 0.7099 | 6.7117 | N | -1.109  | 96 | 2.4624 | 2.8459 | 6.7117 | N | -1.1121 |

## Building the slit-pore model

From the VASP-optimized models presented above, slit-pore models of varying width can be constructed from the following steps.

1. Transpose all coordinates along  $x$  so that the functionality centered on the surface becomes offset.

This resolves unnatural functionality overlap in very narrow slit-pore models. (transpose can be an arbitrary amount,  $\delta$ ).

$$(x_T, y, z) = ((x + \delta), y, z)$$

2. Mirror the cell about a center of inversion,  $i$ , such that the functionality resides on opposite sides of the surface center.  $x$  and  $y$  coordinates can be transposed by the following relations:

$$x_T = |x - 9.86576|$$

$$y_T = |y - 8.544|$$

where 9.86576 and 8.544 are the unit cell dimensions along the  $x$  and  $y$  coordinate, respectively.

Transpose of the  $z$  coordinates results in the mirror inversion of the transposed  $xy$  coordinates about a  $\sigma_h$  plane placed at the pore center. For a slit-pore with the desired pore width  $\lambda$ , it is first necessary to determine the maximum height of the total slit-pore model, measured as the difference in the least positive  $z$  coordinate to the most positive  $z$  coordinate. This is achieved by the following:

$$\text{cell height} = \max_i(z_i + \lambda + 16.65)$$



where  $i$  runs over all  $z$  coordinates and the factor 16.65 represents the sum of the heights of both 3-layered graphitic models plus the kinetic collision diameter of carbon. Finally, the  $z$  coordinates can be transposed by the following:

$$z_T = \text{cell height} - z$$

3. The cell height is also used to set the edge cell length and the effective bound box size for GCMC simulations. An effective slit pore was simulated by setting periodicity in the  $x$  and  $y$  directions, while the  $z$  direction is held constant.

The previous steps are depicted schematically in Figure S4.

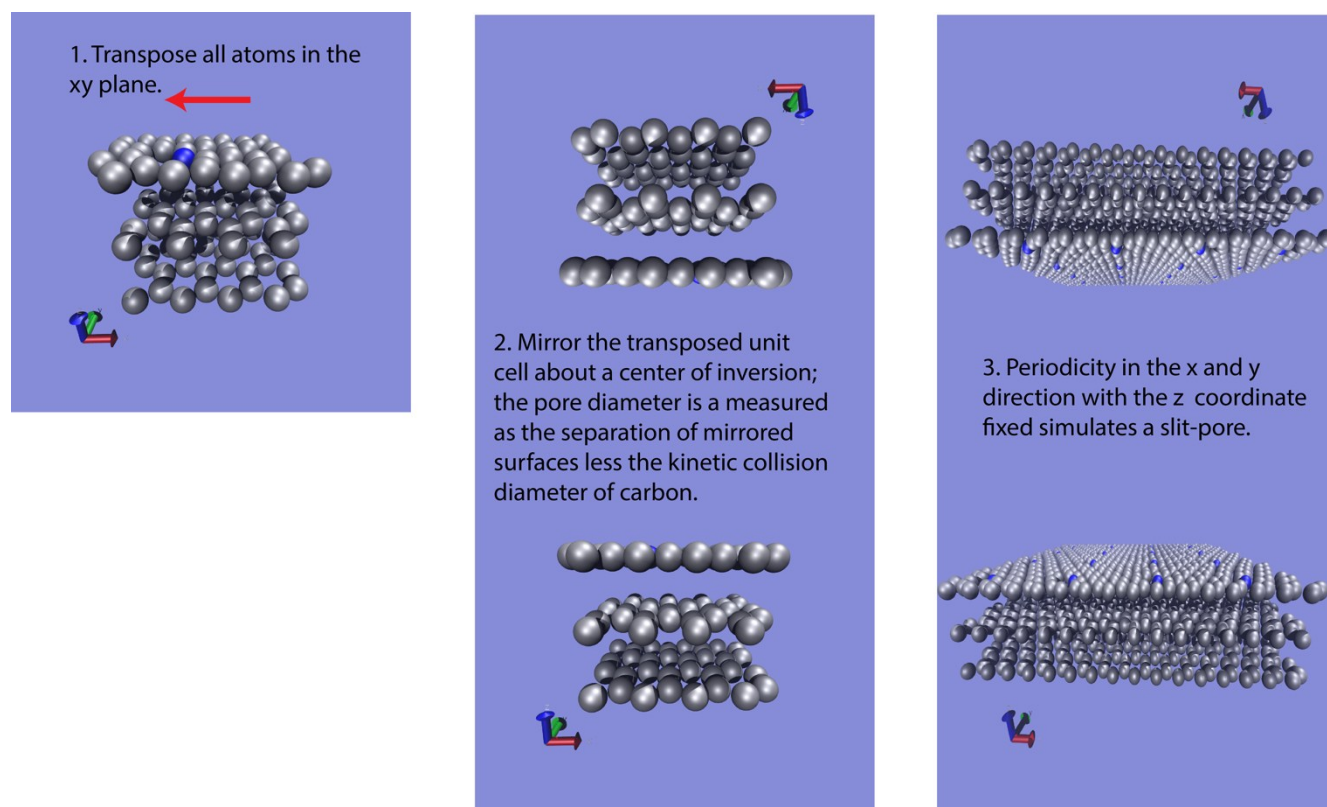

**Figure S4.** Schematic workflow for the creation of a slit-pore unit cell from a VASP optimized structure.

## References

1. Myers AL & Prausnitz JM (1965) Thermodynamics of mixed-gas adsorption. *AIChE Journal* 11(1):121-127.
2. Ruthven DM (1984) *Principles of adsorption and adsorption processes* (John Wiley & Sons).
3. Simon CM, Smit B, & Haranczyk M (2016) pylAST: Ideal adsorbed solution theory (IAST) Python package. *Computer Physics Communications* 200:364-380.
